1     **A conserved role of the duplicated *Masculinizer* gene in sex determination of**  
2                     **the Mediterranean flour moth, *Ephestia kuehniella***

3

4     Sander Visser<sup>1,2,#</sup>, Anna Voleníková<sup>1,2</sup>, Petr Nguyen<sup>1,2</sup>, Eveline C. Verhulst<sup>3</sup>, František Marec<sup>1\*</sup>

5

6

7     <sup>1</sup> Biology Centre of the Czech Academy of Sciences, Institute of Entomology, České Budějovice,  
8     Czech Republic

9     <sup>2</sup> Faculty of Science, University of South Bohemia, České Budějovice, Czech Republic

10    <sup>3</sup> Laboratory of Entomology, Wageningen University & Research, Wageningen, The  
11    Netherlands

12    # Current address: Groningen Institute for Evolutionary Life Sciences, University of Groningen,  
13    Groningen, The Netherlands

14

15    \* Corresponding author

16    E-mail: [marec@entu.cas.cz](mailto:marec@entu.cas.cz)

17

18    Short title:

19    **Duplicated *Masculinizer* gene and sex determination in *Ephestia kuehniella***

## 20 **Abstract**

21 Sex determination in the silkworm, *Bombyx mori*, is based on *Feminizer (Fem)*, a W-linked *Fem*  
22 piRNA that triggers female development in WZ individuals, and the Z-linked *Masculinizer*  
23 (*Masc*), which initiates male development and dosage compensation in ZZ individuals. While  
24 *Fem* piRNA is missing in a close relative of *B. mori*, *Masc* determines sex in several  
25 representatives of distant lepidopteran lineages. We studied the molecular mechanisms of  
26 sex determination in the Mediterranean flour moth, *Ephestia kuehniella* (Pyralidae). We  
27 identified an *E. kuehniella Masc* ortholog, *EkMasc*, and its paralog resulting from a recent  
28 duplication, *EkMascB*. Both genes are located on the Z chromosome and encode a similar  
29 Masc protein that contains two conserved domains but has lost the conserved double zinc  
30 finger domain. We developed PCR-based genetic sexing and demonstrated a peak in the  
31 expression of *EkMasc* and *EkMascB* genes only in early male embryos. Simultaneous knock-  
32 down experiments of both *EkMasc* and *EkMascB* using RNAi during early embryogenesis led  
33 to a shift from male- to female-specific splicing of the *E. kuehniella doublesex* gene (*Ekdsx*),  
34 their downstream effector, in ZZ embryos and resulted in a strong female-biased sex-ratio.  
35 Our results thus confirmed the conserved role of both *EkMasc* and *EkMascB* genes in  
36 masculinization. We suggest that the C-terminal proline-rich domain, we have identified in all  
37 functionally confirmed Masc proteins, in conjunction with the masculinizing domain, is  
38 important for transcriptional regulation of sex determination in Lepidoptera. The function of  
39 the Masc double zinc finger domain is still unknown, but appears to have been lost in *E.*  
40 *kuehniella*.

## 41 **Author summary**

42 The sex-determining cascade in the silkworm, *Bombyx mori*, differs greatly from those of other  
43 insects. In *B. mori*, female development is initiated by *Fem* piRNA expressed from the W  
44 chromosome during early embryogenesis. *Fem* piRNA silences *Masculinizer* (*Masc*) thereby  
45 blocking the male pathway resulting in female development. It is currently unknown whether  
46 this cascade is conserved across Lepidoptera. In the Mediterranean flour moth, *Ephestia*  
47 *kuehniella*, we identified an ortholog of *Masc* and discovered its functional duplication on the  
48 Z chromosome, which has not yet been found in any other lepidopteran species. We provide  
49 two lines of evidence that both the *EkMasc* and *EkMascB* genes play an essential role in  
50 masculinization: (i) they show a peak of expression during early embryogenesis in ZZ but not  
51 in WZ embryos and (ii) their silencing by RNAi results in female-specific splicing of the *E.*  
52 *kuehniella doublesex* gene (*Ekdsx*) in ZZ embryos and in a female-biased sex ratio. Our results  
53 suggest a conserved role of the duplicated *Masc* gene in sex determination of *E. kuehniella*.

## 54 Introduction

55 Sex determination in insects is under the control of a cascade of genes, each affecting the  
56 expression or splicing of the next gene in the pathway [1]. This cascade evolved from the  
57 bottom up with the most conserved gene, *doublesex (dsx)*, at the bottom of the cascade [2]  
58 present in all insects studied to date [3–5]. The *dsx* gene is sex-specifically spliced by an  
59 upstream splicing factor, e.g. *transformer (tra)* in Hymenoptera, Coleoptera, and derived  
60 Brachycera (a suborder of Diptera) [6, 7]. In turn, the activity of *tra* is affected by the presence  
61 of a primary signal gene which can either activate or inactivate *tra* thereby acting as the  
62 initiator of sex determination. The upstream sex determination cascade seems to undergo  
63 rapid evolutionary change, as these genes are often replaced, duplicated and reshuffled, as  
64 have been shown in multiple species. For example, in Hymenoptera, the feminizing gene *wasp*  
65 *overruler of masculinization (wom)* in the jewel wasp, *Nasonia vitripennis*, is a novel gene  
66 originating from a P53 gene duplication, but has also been very recently duplicated, with both  
67 copies of the gene thought to be functional [8]. The gene initiating sexual differentiation in  
68 the honeybee *Apis mellifera*, *complementary sex determiner (csd)*, originated via a duplication  
69 of the *feminizer (fem)* gene, an ortholog of *tra* [9, 10]. In addition, duplications of *tra/fem* have  
70 been detected in many other hymenopteran species, though their role in sex determination  
71 is unknown [6, 11, 12]. Also in the housefly *Musca domestica* (Diptera), the masculinizing gene  
72 *male determiner (Mdmd)* originated through a gene duplication and is located in a locus  
73 containing multiple pseudocopies of the gene [13].

74 The insect order Lepidoptera (moths and butterflies) includes pollinators and several  
75 other beneficial species of high economic importance, e.g. the silkworm *Bombyx mori*, but also  
76 a large number of major pests of agricultural crops, such as the diamondback moth *Plutella*  
77 *xylostella* [14]. The lepidopteran sex determination cascade has diverged from other

78 holometabolous insects as *tra* was presumably lost in this order [6, 15]. The model species in  
79 lepidopteran sex determination research is *B. mori*, which has a WZ/ZZ sex chromosome  
80 constitution with a dominant feminizing W chromosome (Hasimoto 1933 as cited in [16]). In  
81 ZZ individuals, the Z-linked masculinizing gene *Masculinizer* (*Masc*) initiates male  
82 development and dosage compensation. In WZ *B. mori* individuals, the W-linked *Feminizer*  
83 (*Fem*) piRNA targets the *Masc* mRNA resulting in its degradation [17]. In the absence of *Masc*  
84 protein, the *B. mori doublesex* (*Bmdsx*) gene undergoes female-specific splicing resulting in  
85 female development. In the absence of the W chromosome, *Masc* is not suppressed by *Fem*  
86 piRNA and promotes male-specific splicing of *Bmdsx*, although the pathway through which  
87 *Masc* affects splicing of *Bmdsx* is currently unknown. The *Masc* protein contains two zinc finger  
88 motifs in the N-terminus [17], a bipartite nuclear localization signal (bNLS) [18], and a  
89 masculinizing region [19]. An additional segment located in the C-terminus of the protein is  
90 essential for masculinization and dosage compensation but the exact functional motif has yet  
91 to be determined [19, 20]. Masculinization through *Masc* seems to be a conserved feature of  
92 the lepidopteran sex determination mechanism, and has been confirmed in *Trilocho varians*  
93 (Bombycidae) [21], *Ostrinia furnacalis* (Crambidae) [22, 23], *Agrotis ipsilon* (Noctuidae) [24],  
94 and *P. xylostella* (Plutellidae) [25]. In addition, regulation of dosage compensation has been  
95 confirmed in *O. furnacalis* [22] and suggested for *T. varians* [26] and *P. xylostella* [25]. Contrary  
96 to masculinization by *Masc*, feminization through *Fem* piRNA is not conserved in *T. varians*, a  
97 close relative of *B. mori* [21].

98         Considering the economic importance of Lepidoptera, extensive research into sex  
99 determination mechanisms is still lacking in this large insect order. Therefore, we set out to  
100 identify the sex determination mechanism in the Mediterranean flour moth, *Ephestia*  
101 *kuehniella*. This moth was one of early models of genetics in Lepidoptera (see *Anagasta*

102 *kuehniella* in [27]) and later a model for sex chromosome research [28]. It used to be a serious  
103 pest of dried food products, in particular flour, but due to improved hygiene regulations, it is  
104 no longer considered a major pest [29]. Nowadays, *E. kuehniella* is widely accepted as a  
105 factitious host that is easy to rear in large quantities, and thus its eggs and larvae are used as  
106 a food source for a broad range of beneficial arthropods used in biological control [30–32].  
107 Abiotic- and biotic factors affecting the growth and development of *E. kuehniella* have been  
108 studied extensively [33, 34], but egg production could be considerably increased by alteration  
109 of the sex ratio of the population. Males are able to sire the complete offspring of at least 9  
110 females [35], and therefore the number of males in the population can be reduced while  
111 retaining complete fertilization of the population. Therefore, identification of the sex  
112 determining mechanism in *E. kuehniella* may potentially provide candidate target genes to  
113 alter the sex ratio, thereby increasing egg production.

114 Here, we identified a *Masc* ortholog in *E. kuehniella*, *EkMasc*, and its paralog resulting  
115 from a recent duplication, *EkMascB*. We developed a PCR-based genetic sexing method in *E.*  
116 *kuehniella* to be able to analyze *EkMasc* and *EkMascB* function using RNAi during early  
117 embryogenesis. Our results show that despite the loss of the zinc finger motifs, their role in  
118 masculinization is intact. In addition, we characterized a male-specific splice variant of *EkMasc*  
119 and *EkMascB*, skipping the exon containing the masculinizing region. Finally, we identified  
120 conserved regions in the C-terminus of all functionally confirmed lepidopteran *Masc* proteins  
121 that are likely involved in masculinization. Overall, our results substantially add to the  
122 understanding of the core genes of the lepidopteran sex determination cascade and its  
123 evolution, but also provide target genes for sex ratio optimization for mass rearing purposes.

124

## 125 **Results**

## 126 **Identification of *EkMasc* and its paralog *EkMascB***

127 Initial sequences of *Masculinizer* (*EkMasc*) in *E. kuehniella* were identified using reverse  
128 transcription PCR (RT-PCR). Full cDNA sequences were subsequently obtained using 5' and 3'  
129 rapid amplification of cDNA ends (RACE) followed by sequencing. Two variants of *EkMasc* were  
130 consistently found, but we were not sure if they were allelic variants or duplication of the  
131 *Masc* gene. A BLASTn search of the two complete cDNA sequences against the draft genome  
132 assembly of *E. kuehniella* revealed a single scaffold with both copies of the gene, strongly  
133 suggesting that the two sequences obtained are not allelic variants but signatures of a real  
134 *EkMasc* duplication, which we denoted *EkMascB*. The open reading frames of *EkMasc* and  
135 *EkMascB* are in opposite orientation (tail-tail) with ~23 kb distance between the two genes  
136 (Fig 1A). In addition, an ortholog of the *6-phosphogluconate dehydrogenase* (*Ek6-Pgd*) gene  
137 was identified in the same scaffold in close proximity to *EkMasc*. Within the intron of *Ek6-Pgd*  
138 between exons 7 and 8, a complete mariner transposon lacking an intact open reading frame  
139 was identified and a similar but partial mariner transposon was identified between the *EkMasc*  
140 and *EkMascB* genes, containing only the 3' region of the transposon. The two mariner  
141 transposon sequences share 93% sequence identity.

142

## 143 **Localization of *EkMasc* and *EkMascB* on the Z chromosome**

144 In *B. mori* and *Plutella xylostella*, *Masc* is located on the Z chromosome [17, 25]. As with most  
145 lepidopterans, the Z chromosome in *E. kuehniella* is present in one copy in females but in two  
146 copies in males [36]. Gene content of the Z chromosome between lepidopteran species is  
147 generally highly conserved [37–39], but no information regarding the content of the Z  
148 chromosome of *E. kuehniella* is available. Therefore, we verified the location of *EkMasc* on the  
149 Z chromosome in *E. kuehniella* using quantitative real-time PCR (qPCR) on genomic DNA. We

150 tested two hypotheses regarding the location of the two genes, (i) *EkMasc* and *EkMascB* are  
151 Z-linked resulting in a female to male ratio of 0.5 and (ii) both genes are autosomal resulting  
152 in a ratio of 1 [37]. Data from qPCR with genomic DNA of *E. kuehniella* females and males  
153 targeting both *EkMasc* and *EkMascB* genes at the same time were normalized against the  
154 autosomal reference gene, *Acetylcholinesterase 2 (Ace-2)* (S1 Fig). An unpaired two-tailed *t*-  
155 test for unequal variances showed a statistically significant difference in the female and male  
156 normalized quantities ( $P = 0.0049$ ), thus ruling out the autosomal hypothesis. In addition, a  
157 comparison of the male normalized quantities against the female normalized quantities  
158 multiplied by 2 showed no significant difference between ratios ( $P = 0.8415$ ), therefore  
159 strongly suggesting that both *EkMasc* and *EkMascB* are located on the Z chromosome. These  
160 normalized *EkMasc+EkMascB* quantities were compared between females and males showing  
161 that the normalized female to male ratio of *EkMasc+EkMascB* in *E. kuehniella* was  $0.505 \pm$   
162  $0.032$ .

163 Our Southern hybridization data consistently showed that the two signals present in  
164 both sexes are stronger in males than in females (S2 Fig), which is in line with the qPCR results  
165 and confirms the Z-linkage of *EkMasc* and *EkMascB*. This further corroborates our conclusion  
166 that there are two *EkMasc* copies, because the single Z chromosome in females shows two  
167 bands in Southern hybridization, ruling out allelic variation.

168

### 169 **Nucleotide and protein comparison of *EkMasc* and *EkMascB***

170 *EkMasc* and *EkMascB* complete cDNA sequences were used in a BLASTn search against the  
171 draft genome to identify and annotate the exons of both genes. Next, we aligned *EkMasc* to  
172 *EkMascB* to compare the structure of both genes. All exons of *EkMasc* were also present in  
173 *EkMascB*, and both genes contained an open reading frame (S3 Fig). Divergence between the



174 two genes, i.e. single nucleotide polymorphisms (SNPs), insertions and deletions (indels), was  
175 strongest in the 5'- and 3'- UTRs and in the intron sequences. We obtained five splice variants  
176 for *EkMasc* and seven splice variants for *EkMascB* from sequencing cloned RT-PCR and RACE-  
177 PCR products. Six of these splice variants (two for *EkMasc* and four for *EkMascB*) appeared to  
178 be present at a very low frequency as they were not visibly amplified and contained early stop  
179 codons as a consequence of exon-skipping, intron-retention, or premature polyadenylation.  
180 Therefore, we considered these six variants biologically non-relevant.

181 The remaining six splice variants (three for each gene) were abundantly present. In  
182 both genes, the first and second splice variant, *EkMasc-1* and *EkMasc-2* (and *EkMascB-1* and  
183 *EkMascB-2*), contained the bipartite nuclear localization signal (bNLS) [18] and two cysteine  
184 residues that are presumably essential for masculinization [19] and differ only in splicing of  
185 the terminal (non-coding) exon (Fig 1B; S3 Fig). These two splice variants are the only variants  
186 detected during early embryogenesis (Fig 2A). The third splice variant, termed masculinizing  
187 domain skipping *Masc* (*EkMasc<sup>ms</sup>* and *EkMascB<sup>ms</sup>*) skips the exon containing the masculinizing  
188 domain (exon VII), resulting in an early stop codon (S3 Fig). This splice variant appears later  
189 during development and exclusively in males (Fig 2A). Splice forms containing the  
190 masculinizing domain appear to predominate in the testes, while *EkMasc<sup>ms</sup>* and *EkMascB<sup>ms</sup>*  
191 appear to predominate in somatic tissues (Fig 2B). Due to the importance of the masculinizing  
192 domain for *Masc* function, we investigated whether the *Masc<sup>ms</sup>* splice form is present in other  
193 lepidopterans or if it is specific to *E. kuehniella*. The presence and distribution of the *Masc<sup>ms</sup>*  
194 splice form was tested in the closely related Indian meal moth, *Plodia interpunctella*, and the  
195 distant codling moth, *Cydia pomonella*. In both species, *Masc<sup>ms</sup>* is found in male somatic  
196 tissues but not in the testes, and results in a premature stop codon, similar to *E. kuehniella*  
197 (Fig 2C, D). In *P. interpunctella*, we also found that the exon containing the masculinizing

198 region is shorter than the annotated *PiMasc* sequence, resulting in an exon of similar size to  
199 the homologous exon in *EkMasc*.

200 The complete *EkMasc* mRNA sequence containing the full open reading frame is 2425  
201 bp (*EkMasc-1*) or 2667 bp long (*EkMasc-2*) depending on the splice variation in the 3' terminal  
202 exon of the gene and encodes a 436 amino acid protein. Similarly, the complete mRNA  
203 sequence of *EkMascB* is 2346 bp (*EkMascB-1*) or 2644 bp (*EkMascB-2*) long and encodes a  
204 slightly shorter protein of 419 amino acids. Comparison of EkMasc with EkMascB shows that  
205 they share 91.7% homology over the entire length of the proteins and 95.5% homology in the  
206 region likely to be important for masculinization [19], as seen in Fig 1C. EkMasc and EkMascB  
207 differ from each other by 6 indels and 23 substitutions (S4 Fig). Both the male determining  
208 domain [19] and the bNLS domain [18] are present in both EkMasc and EkMascB. In addition,  
209 two substitutions are present within the spacer sequence of the bNLS domain, but the domain  
210 itself and the masculinizing domain share complete homology. Interestingly, the two zinc-  
211 finger motifs present in the N-terminus of BmMasc [17] and most other lepidopteran Masc  
212 proteins [21, 22, 24, 25] were lost in both EkMasc and EkMascB. The residues of the double  
213 zinc finger motif remain part of the transcripts of both genes, yet the sequences have  
214 degenerated independently, and the accumulation of mutations has shifted the open reading  
215 frame of both genes downstream of the degenerated domains (Fig 1B).

216

### 217 **Functional analysis of *EkMasc* and *EkMascB***

218 Expression levels of all *EkMasc* and *EkMascB* splice forms were measured during  
219 embryogenesis using quantitative reverse transcription PCR (qRT-PCR) to determine sex-  
220 specific expression patterns for both genes separately. Embryos were sexed using an in-house  
221 developed PCR-based sexing system that shows an additional band in female samples (S5 Fig).

222 Both *EkMasc* and *EkMascB* were expressed throughout embryogenesis and both genes  
223 followed the same pattern of expression level differences between the sexes (Fig 3). At 12  
224 hours post oviposition (hpo), no significant difference in expression level of both genes was  
225 observed between the sexes. After 12 hpo, expression levels of *EkMasc* and *EkMascB*  
226 increased in males until they reached a maximum around 16 hpo, while the expression levels  
227 decreased in females simultaneously. After 16 hpo, expression levels decreased in males and  
228 reached levels comparable to females at approximately 24 hpo. We performed an unpaired  
229 two-tailed *t*-test with unequal variances to test for differences between the sexes, showing  
230 statistically significant differences at 14–22 hpo for both genes (S1 Table).

231 To verify the function of *EkMasc* and *EkMascB*, we performed a simultaneous knock-  
232 down of both genes by injecting short interfering RNAs (siRNAs) targeting a conserved region  
233 into eggs 1–2 hpo. We performed two separate knock-down experiments using siRNA  
234 targeting either exon II (siMasc\_II) or exon VII (siMasc\_VII), which contains the masculinizing  
235 domain (S6 Fig). For the third treatment, we injected a negative control siRNA designed  
236 against the *green fluorescent protein (GFP)* gene, as previously done [17]. We assessed knock-  
237 down efficiency by qRT-PCR at 16 hpo (Fig 4; S2 Table), the peak of *EkMasc* and *EkMascB*  
238 expression levels, as this is presumably the time point at which the expression of *EkMasc* and  
239 *EkMascB* is essential for male development. The average expression level of *EkMasc* in ZZ  
240 embryos after injection with siMasc\_II and siMasc\_VII was reduced to 51.6% ( $P = 0.0311$ ) and  
241 52.0% ( $P = 0.0300$ ), respectively (Fig 4A), and *EkMascB* expression in ZZ embryos was reduced  
242 to 41.8% ( $P = 0.0137$ ) and 39.1% ( $P = 0.0164$ ), respectively (Fig 4B). In WZ embryos, expression  
243 of *EkMasc* was reduced to 65.4% ( $P = 0.0335$ ) and 50.7% ( $P = 0.0034$ ) after injection with  
244 siMasc\_II and siMasc\_VII, respectively, while *EkMascB* showed reduced expression levels of  
245 62.8% ( $P = 0.0416$ ) and 49.5% ( $P = 0.0090$ ), respectively (Fig 4C, D).

246 The *doublesex* (*dsx*) gene is often used as indicator of sexual development in knock-  
247 down experiments involving sex determination genes [21, 25]. We identified an ortholog of  
248 this gene in *E. kuehniella*, *Ekdsx*, and confirmed its sex-specific splicing using RT-PCR in pupae  
249 (S7 Fig). A single male-specific splice form was identified in males and two dominant female-  
250 specific splice forms were identified in females (S7A, B Fig). This is similar to the splicing  
251 structure identified in *B. mori* [40, 41]. In addition, a third female-specific splice form was  
252 observed in females (S7C Fig), but we failed to sequence this third female-specific splice form,  
253 and thus its splicing structure is currently unknown. Splicing of *Ekdsx* was female-specific in all  
254 early embryos, but transitions to male-specific splicing were observed only in ZZ individuals,  
255 16–18 hpo at 21–22°C (S7D Fig). After injection of siRNA, sex-specific splicing of *Ekdsx* was  
256 assessed at 48 hpo to ensure that *Ekdsx* splicing stabilized in either the female- or male-  
257 specific isoform(s). WZ individuals injected with any of the three siRNAs (control siGFP,  
258 siMasc\_II, and siMasc\_VII) showed predominantly female-specific splicing of *Ekdsx* as  
259 expected (Fig 4F). ZZ individuals injected with control siGFP showed predominantly male-  
260 specific splicing of *Ekdsx* while those injected with siMasc\_II or siMasc\_VII showed  
261 predominantly female-specific splicing of *Ekdsx* (Fig 4E) comparable to WZ individuals.  
262 Approximately 400 eggs injected with siGFP were left to develop of which 12% (48/400)  
263 hatched and survived to adulthood. Similarly, approximately 10% (49/500) of the eggs injected  
264 with siMasc\_II and approximately 8% (48/620) of the eggs injected with siMasc\_VII hatched  
265 and survived to adulthood. Adults were phenotypically sexed based on external genitalia,  
266 revealing sex-ratios not significantly differing from 0.5 in those injected with siGFP ( $P = 0.5637$ )  
267 and siMasc\_II ( $P = 0.8864$ ) (Fig 5). Adults developing from embryos injected with siMasc\_VII  
268 showed a strong female-biased sex-ratio of 0.85, which differed significantly from 0.5 ( $P =$   
269  $9.226e-07$ ). The heads of females that developed from siMasc\_VII-injected embryos were

270 used to test the genetic sex of the individual, which showed that all phenotypic females have  
271 WZ sex chromosomes, suggesting a male-killing effect of RNAi with siMasc\_VII.

272

### 273 **Masculinizer comparison in Lepidoptera**

274 We compared all published and functionally confirmed Masc protein sequences to identify  
275 any additional conserved domains and/or features of the proteins. Previously, three  
276 conserved domains were identified in BmMasc: (1) the double zinc finger domain [17], (2) the  
277 bNLS domain [18], and (3) the masculinizing domain [19]. The two cysteine residues that  
278 define the masculinizing domain and the bNLS domain are present in all species. The double  
279 zinc finger motif is conserved in most species with the exceptions of *E. kuehniella*, which lost  
280 both motifs in both copies of the gene, and potentially in *Trilocho varians* that has a deletion  
281 in the second zinc finger [21].

282 After aligning all functionally confirmed lepidopteran Masc protein sequences, we  
283 observed a relatively high level of proline residues in all proteins (S8 Fig). The average proline  
284 content of lepidopteran proteins is 5.52% (*B. mori*), 5.86% (*P. xylostella*), and 5.35% (*P.*  
285 *interpunctella*), while the proline content in their respective Masc proteins is 11.56%, 17.37%,  
286 and 13.73%. Given the less than 0.4% variation in the proline contribution across the total  
287 protein databases between the species, we assume that *E. kuehniella* has similar proline levels  
288 across all proteins, whereas EkMasc and EkMascB consist of 16.09% and 17.22% proline  
289 residues, respectively. To determine the distribution of the proline residues across the protein  
290 sequence, we performed a sliding window analysis with window size 25 on the Masc proteins  
291 previously confirmed to be functionally conserved [17, 21, 22, 24, 25] and EkMasc (Fig 6). Due  
292 to the high level of homology between the two Masc sequences in *E. kuehniella*, we excluded  
293 EkMascB from the analysis, however, a comparison of EkMasc and EkMascB is shown in S9

294 Fig. The analysis identified two regions with an increased proline content in all species. The  
295 first proline-rich domain (PRD-1) is localized between the second zinc finger domain and the  
296 masculinizing domain, and the second proline-rich domain (PRD-2) at the C-terminus of the  
297 proteins (Fig 6). The *BmMasc* mutant of *B. mori*, which lacked the first 294 amino acids of the  
298 protein, was able to masculinize BmN-4 cells, while the same mutant additionally missing the  
299 final 75 amino acids failed to do so [19]. As indicated in Fig 7A, this region of the protein  
300 corresponds to PRD-2. In addition to PRD-2, we also identified two consecutive tyrosine-  
301 asparagine (YN) amino acid residues in this region that are conserved in all six species (Fig 7B).  
302 Only in *P. interpunctella* Masc, this tyrosine-asparagine motif is missing, but it should be noted  
303 that this region of the *PiMasc* transcript has not yet been confirmed by RT-PCR and the *PiMasc*  
304 protein has not been functionally confirmed.

305

## 306 Discussion

307 Duplications of sex determining genes have been described in several insect species. In  
308 particular, duplications of the *transformer (tra)* gene, the main splicing regulator of *dsx*, are  
309 common in the order Hymenoptera [6, 10–12]. In Lepidoptera, only a few species have been  
310 investigated, but apart from the primary signal gene in the silkworm, i.e. *Feminizer (Fem)*,  
311 which consists of a high copy tandem repeat generating *Fem* piRNA [17], no duplications of  
312 lepidopteran sex determination genes have been reported. Here, we report a duplication of  
313 the male-determining gene *Masculinizer (Masc)* in *E. kuehniella*. Both the *EkMasc* and  
314 *EkMascB* genes lack the tandem zinc finger motif, but do contain the masculinizing domain.  
315 We developed a PCR-based genetic sexing method in *E. kuehniella* and analyzed the effects of  
316 simultaneous knock-down of these genes on sexual development. Functional analysis showed

317 that the simultaneous knock-down of *EkMasc* and *EkMascB* results in female-specific splicing  
318 of *Ekdsx* and lethality in males.

319 The masculinizing function of *Masc* was initially identified in *B. mori* [17] and is  
320 conserved in *Trilocha varians*, *Ostrinia furnacalis*, *Agrotis ipsilon*, and *Plutella xylostella* [21,  
321 22, 24, 25]. Similar to the other species, knock-down of *EkMasc* and *EkMascB* in *E. kuehniella*  
322 results in female-specific splicing of *Ekdsx*. The high level of protein similarity between *EkMasc*  
323 and *EkMascB* indicates that the two proteins likely have the same function in male  
324 determination. In particular, the high level of conservation between the proteins in the male-  
325 determining domain and the C-terminus suggests a conserved function in sex determination  
326 as these protein segments are indicated to be essential for *Masc* function [19].

327 Simultaneous knock-down of *EkMasc/EkMascB* showed female-specific *Ekdsx* splicing  
328 in genetic males, but no feminized males were found among adults. However, when using the  
329 siRNA targeting the exon containing the masculinizing domain (siMasc\_VII), we observed a  
330 highly female-biased sex ratio that is likely due to the male-killing effect caused by the loss of  
331 dosage compensation, similar to what was found in *B. mori* [17, 20] and hypothesized in *O.*  
332 *furnacalis* [22] and *P. xylostella* [25]. Surprisingly, this male-killing effect was not observed  
333 when using the siRNA targeting exon 2, even though both siRNAs showed similar effects on  
334 the *EkMasc/EkMascB* expression levels and *Ekdsx* splicing pattern. Whether this is caused by  
335 the different exons being targeted by the two siRNAs or due to differences in stability of the  
336 siRNAs is currently unknown.

337 The presence of female-specific *Ekdsx* in genetic males injected with siMasc\_II, but the  
338 absence of a male-killing effect and lack of persistent phenotypic feminization provide insights  
339 into the sex determination mechanism in *E. kuehniella*. Under normal conditions, splicing of  
340 *Ekdsx* in ZZ embryos transitions from female- to male-specific at 16–18 hpo, indicating that

341 sex is determined at this point of development. After injections with siMasc\_II, splicing of  
342 *Ekdsx* was assessed at 48 hpo, showing predominantly female-specific splicing in genetic males  
343 30–32 hours after the sex of the individual is normally established. However, RNAi is transient  
344 and the expression levels of *EkMasc/EkMascB* likely increased after a number of hours,  
345 resulting in a reversal of female-specific *Ekdsx* splicing to male-specific splicing of *Ekdsx* >48  
346 hpo and the development of a male phenotype. This suggests a strong plasticity in timing of  
347 sexual development in *E. kuehniella*.

348         The pattern of sex-specific expression of *Masc* was previously shown only in *B. mori*  
349 [17]. In early male embryos, expression of *Masc* increases and subsequently decreases rapidly,  
350 while expression in female embryos gradually decreases after oviposition [17]. Here we show  
351 that differential expression of *EkMasc* and *EkMascB* also occurs during early embryogenesis  
352 in *E. kuehniella*. As found in *B. mori*, the window of differential expression is narrow in *E.*  
353 *kuehniella*, starting at approximately 12–14 hpo, with a maximum around 16 hpo, and ending  
354 before 24 hpo. The peak of *EkMasc* and *EkMascB* expression in males corresponds to the first  
355 occurrence of the male-specific splice form of *Ekdsx*, suggesting a close interaction between  
356 these genes. However, previous studies have shown that dosage maintenance of duplicated  
357 genes occurs at both the transcriptional and translational levels in eukaryotes and that  
358 repression of translation occurs rapidly rather than gradually [42]. Therefore, it should be  
359 noted that even though both *EkMasc* and *EkMascB* show sex-specific differential expression,  
360 translational repression might prevent one of the genes to be truly functional. Future research  
361 should therefore focus on the separate knock-down/-out of *EkMasc* and *EkMascB* to  
362 determine whether one or both genes are involved in sex determination and/or dosage  
363 compensation in *E. kuehniella*.



364 We identified a male-specific splice variant of *EkMasc* and *EkMascB* lacking the exon  
365 essential for masculinization in *E. kuehniella*, i.e. *EkMasc<sup>ms</sup>* and *EkMascB<sup>ms</sup>*. We further  
366 confirmed this splice variant in the closely related *P. interpunctella* (Pyralidae) and the distant  
367 codling moth, *C. pomonella* (Tortricidae). In all three species, *Masc<sup>ms</sup>* results from an early stop  
368 codon and therefore leads to a truncated protein. Interestingly, an alternative splice variant  
369 of *BmMasc* has been identified [43] that lacks the exon containing the *Fem* piRNA target  
370 sequence and is therefore not sensitive to the down-regulation by *Fem* piRNA. In *B. mori*, this  
371 splice variant is present in both sexes and is essential for the development of the external  
372 female genitalia. In contrast, the *Masc<sup>ms</sup>* splice variant is found predominantly in male somatic  
373 tissues, but its function is unclear. However, the pattern of splicing and its apparent  
374 conservation across Lepidoptera is remarkable. Only in *P. interpunctella* and *C. pomonella*, the  
375 *Masc<sup>ms</sup>* protein does contain the two zinc finger domains, and therefore in these species *Masc*  
376 might have a tertiary function aside from masculinization and dosage compensation.

377 The flour moth *E. kuehniella* is the first species described in which the *Masc* zinc finger  
378 motifs were lost naturally. Initially, the dosage compensation function of *Masc* in *B. mori* was  
379 predicted to involve the zinc finger domains in the N-terminus of the protein due to their  
380 known ability to bind DNA and RNA [17]. However, recent data revealed that the masculinizing  
381 domain of *BmMasc*, rather than the zinc finger domains, regulates dosage compensation [20,  
382 26]. Male-specific lethality of *EkMasc/EkMascB*-silenced individuals suggests that dosage  
383 compensation also occurs during embryogenesis in *E. kuehniella* and that *EkMasc* and/or  
384 *EkMascB* regulate(s) this process either directly or indirectly. This supports the dispensable  
385 role of the zinc finger domains in both sex determination and dosage compensation as found  
386 in *B. mori* [19, 20, 26]. High conservation in other lepidopteran species, however, suggests an  
387 important and conserved function of the zinc finger domains for the *Masc* protein function.

388 What this function is, remains currently unknown, but one proposed hypothesis states that  
389 the domains increase the binding efficiency of Masc to target RNA or DNA [20]. In addition,  
390 they hypothesized that the absence of the zinc finger domain in a mutant strain of *B. mori*  
391 might be compensated by another zinc finger-containing gene, *Bmzmf-2*. Overexpression of  
392 *Bmzmf-2* in BmN cells, derived from female ovarian cells, resulted in partial male-specific  
393 splicing of *Bmdsx*, but only if both zinc finger domains were intact [44]. In *E. kuehniella*, we  
394 were able to identify a potential ortholog, *Ekzmf-2*, containing both zinc finger domains (S10  
395 Fig). Therefore, it is possible that the loss of the zinc finger domains in *EkMasc* and *EkMascB*  
396 is compensated by the presence of *Ekzmf-2* or another zinc finger domain-containing protein.  
397 However, why this loss of the zinc finger domains occurred only in *E. kuehniella*, even though  
398 *zmf-2* is likely to be conserved in Lepidoptera, is unclear. Alternatively, it is possible that the  
399 combined expression of *EkMasc* and *EkMascB* can compensate for the potentially reduced  
400 efficiency of Masc protein in *E. kuehniella*, thereby negating the loss of the zinc finger domains.  
401 Individual knock-out experiments of *EkMasc* and *EkMascB* could provide more clarity  
402 regarding the role of the zinc finger domains in *E. kuehniella* and Lepidoptera in general.

403         Similar to the *transformer* gene in Diptera, Coleoptera, and Hymenoptera, the protein  
404 sequence of Masc is highly variable in Lepidoptera. Apart from the previously identified  
405 masculinizing domain, the two zinc finger motifs and the bNLS domain, a shared feature of the  
406 Masc proteins is the relatively high level of proline content concentrated in two proline-rich  
407 domains, PRD-1 and PRD-2. Proline-rich repeats are known to have protein-protein binding  
408 capabilities and are often involved in binding of transcription factors [45, 46]. The presence of  
409 a proline-rich domain at the C-terminus of the protein is another similarity between Masc and  
410 TRA [3], the latter being a confirmed splicing regulator of *dsx* in three insect orders. In addition,  
411 it has been shown that not only the masculinizing domain but also a segment of the C-terminus

412 (within the final 75 amino acids) of the protein is essential for masculinization [19]). The C-  
413 terminus of Masc coincides with PRD-2, not only in *B. mori* but in all lepidopteran Masc  
414 proteins identified. Therefore, we propose that PRD-2, rather than the zinc fingers, of the  
415 Masc proteins in conjunction with the masculinizing domain are important for transcriptional  
416 regulation and sex determination in Lepidoptera, either through providing protein stability as  
417 previously suggested [19] or through binding of transcription factors, or both.

418 In conclusion, we identified the first duplication of *Masc* in Lepidoptera, *EkMasc* and  
419 its paralog *EkMascB*, on the Z chromosome of *E. kuehniella*. Knock-down of *EkMasc* and  
420 *EkMascB* revealed male lethality similar to that previously found in other lepidopteran  
421 species, confirming that *Masc* is a good target gene to eliminate males, a trait that might be  
422 exploited in the future to shift the sex ratio of populations of *E. kuehniella* to increase egg  
423 production. In addition, we have identified another, seemingly conserved splice form of *Masc*,  
424 *Masc<sup>ms</sup>*, which reveals an additional, previously unknown level of complexity to the  
425 lepidopteran sex determination pathway. Overall, our data contribute to the understanding  
426 of *Masc* function in *E. kuehniella* and Lepidoptera in general and provide further information  
427 regarding *Masc* as a potential target for lepidopteran pest management.

428

## 429 **Materials and methods**

### 430 **Insects**

431 A laboratory strain (WT-C02) of the Mediterranean flour moth, *E. kuehniella*, was used for all  
432 experiments. This wild-type strain was established in 2002 from individuals collected in Boršov  
433 nad Vltavou, Czech Republic, and has been maintained on artificial diet [47] under 12:12 (L:D)  
434 conditions at 20–22°C. The codling moth, *Cydia pomonella*, samples used were obtained from  
435 the laboratory strain Krym-61; its origin and rearing were described earlier [48]. Larvae of the

436 Indian meal moth, *Plodia interpunctella*, were obtained from a local population collected in  
437 České Budějovice, Czech Republic.

438

#### 439 **Identification and isolation of *EkMasc* and *EkMascB* sequences**

440 To identify *Masculinizer* in *E. kuehniella*, reverse transcription PCR (RT-PCR) was done using  
441 RNA from approximately 50 pooled eggs 24 hours post oviposition (hpo) and single male pupa  
442 samples, both in duplicate. Total RNA was isolated using TRI Reagent (Sigma-Aldrich, St. Louis,  
443 MO) according to the manufacturer's protocol, using chloroform for phase separation. RNAs  
444 were dissolved in 40 µL nuclease-free water and their concentrations were measured on a  
445 NanoDrop 2000 spectrophotometer (Thermo Fisher Scientific, Waltham, MA). Approximately  
446 1 µg RNA per sample was converted to cDNA using the ImProm-II Reverse Transcription  
447 System kit (Promega, Madison, WI) using the Oligo(dT)<sub>15</sub> primer supplied with the kit and with  
448 a final concentration of 3 mM MgCl<sub>2</sub> according to the manufacturer's instructions. Primers  
449 were designed based on the putative *Masc* transcript sequence of *P. interpunctella* (annotated  
450 as maker-scaffold92-augustus-gene-0.127-mRNA-1) obtained through LepBase (lepbase.org;  
451 [49]) using Geneious 9.1.6 (<https://www.geneious.com>; [50]) with default settings. All primers  
452 used in the article can be found in S3 Table. PCR was carried out in a final volume of 10 µL  
453 containing 0.2 µM of each primer (*Masc\_F1* and *Masc\_R1*), 0.2 mM of each dNTP, 1× Ex *Taq*  
454 PCR buffer, 0.025 units of Ex *Taq* DNA polymerase (TaKaRa, Otsu, Japan), and 1 µL of cDNA.  
455 PCR amplification was performed using a standard thermocycling program of 94°C for 3 min  
456 initial denaturation; 35 cycles of denaturation at 94°C for 30 s, annealing at 60°C for 30 s, and  
457 extension at 72°C for 1 min; with a final extension at 72°C for 3 min. PCR amplification was  
458 confirmed by gel electrophoresis using a 1.5% agarose gel in 1× TAE buffer and visualized using  
459 ethidium bromide (EtBr). The remaining PCR products were pooled, purified using the Wizard®

460 SV Gel and PCR Clean-Up System (Promega), cloned into the pGEM-T Easy vector (Promega),  
461 and finally sequenced (SEQme, Dobříš, Czech Republic) to obtain the initial EkMasc and  
462 EkMascB sequences (see S1 Methods for details).

463 Full-length cDNA sequences of *EkMasc* and *EkMascB* were obtained by rapid  
464 amplification of cDNA ends PCR (RACE-PCR) for both 3'- and 5'- ends (see S1 Methods for  
465 details). In short, to obtain the 3' region of the cDNA, first strand cDNA synthesis was prepared  
466 using 1 µg of the RNA sample from pooled 24 hpo eggs, the adapter primer (AP), and the  
467 ImProm-II Reverse Transcription System (Promega) as described above. Two rounds of PCR  
468 amplification followed. In the first round, the Masc\_F1 primer and the abridged universal  
469 amplification primer (AUAP) were used. In the second round, the primers were substituted by  
470 Masc\_VII\_F1 and AUAP and the template DNA consisted of a 100× diluted PCR product of the  
471 first round. For the isolation of the 5'-UTR of *EkMasc* and *EkMascB*, first strand cDNA was  
472 synthesized using 1 µg of the same RNA sample with the ImProm-II Reverse Transcription  
473 System as described above, but using the Masc\_V\_R1 primer. The 5'-RACE-PCR was performed  
474 as described previously [51]. Full-length cDNA sequences of *EkMasc* and *EkMascB*, two splice  
475 variants each, are available (GenBank accession numbers MW505939-MW505942). In  
476 addition, all splice variants of *EkMasc* and *EkMascB* were aligned and can be accessed at  
477 <https://easy.dans.knaw.nl/ui/datasets/...> (submitted).

478

## 479 **Genome assembly**

480 To assess the splicing structure and genome organization of *EkMasc* and *EkMascB*, we  
481 sequenced the male genome of *E. kuehniella* using Oxford Nanopore technology. DNA was  
482 extracted from 5 male larvae using cetyltrimethylammonium bromide (CTAB) DNA extraction  
483 as described elsewhere [52] and sequenced on the Nanopore PromethION by Novogene (HK)

484 Co., Ltd. (Hong Kong, China). The sequencing yielded 16.2 Gb of data equivalent to ca. 36.8×  
485 genome coverage (assuming a genome size of 440.1 Mb, as determined earlier [53]) with N50  
486 of 24.8 kb. The long reads were deposited in the Sequence Read Archive under accession  
487 number PRJNA683200. The reads were assembled using Canu version 1.8 [54] with the  
488 following parameters, genomeSize = 440.1m and minReadLength = 10000. The complete  
489 cDNA sequences of *EkMasc* and *EkMascB* obtained through RACE PCRs were used in a BLASTn  
490 search against the assembled genome and exons were annotated using Geneious 9.1.6. A  
491 fragment of the scaffold containing *EkMasc*, *EkMascB*, and an additional 20 kb flanking  
492 sequence on either side (sequence submitted to GenBank) was further analyzed using BLASTn  
493 in LepBase and NCBI to identify genes and transposable elements. For LepBase, BLASTn  
494 searches were only restricted to the CDS database of *P. interpunctella*, while the search using  
495 NCBI was restricted to the nucleotide collection of Lepidoptera.

496

#### 497 **Assessment of copy number and localization of *Masc* using Southern hybridization**

498 DNA was extracted from single female and male pupae using CTAB DNA extraction as  
499 described elsewhere [52]. Concentrations were measured on a Qubit 3.0 Fluorometer using  
500 the dsDNA BR Assay Kit (Invitrogen, Carlsbad, CA), and approximately 4 µg DNA per sample  
501 was used for DNA digestion reactions. DNA was double digested using *NdeI* × *NotI*, *DraI* × *NheI*  
502 (all Fermentas, Vilnius, Lithuania), or *AgeI* × *BspHI* (New England Biolabs, Ipswich, MA)  
503 enzymes (see S1 Methods for details). All digested DNA was separated by electrophoresis on  
504 a 1% TBE agarose gel and subsequently transferred by capillary transfer to an Amersham  
505 Hybond-N+ nylon membrane (GE Healthcare, Milwaukee, WI).

506 A probe specific to *EkMasc* with high homology to *EkMascB* (96%) was made by PCR-  
507 labeling (see S1 Methods for details). The probe was labeled with digoxigenin-11-dUTPs

508 (Roche Diagnostics, Mannheim, Germany) using primers Masc\_Sb\_F and Masc\_Sb\_R. For  
509 Southern hybridization, 100 ng of the probe was used. The Southern blot assay was performed  
510 as described previously [55] with some modifications [56].

511

### 512 **Z-linkage of *EkMasc* and *EkMascB* by quantitative real-time PCR**

513 To assess the localization of *EkMasc* and *EkMascB* on the Z chromosome, we performed  
514 quantitative real-time PCR (qPCR) using genomic DNA as a template and *Acetylcholinesterase*  
515 2 (*Ace-2*) as an autosomal reference gene as described previously [39] (see S1 Methods for  
516 details). This method relies on the comparison of female and male samples as the ratio  
517 between Z-linked genes and autosomal genes is 1:2 in females and 2:2 in males. DNA was  
518 isolated from single female and male *E. kuehniella* larvae in triplicate using the NucleoSpin  
519 DNA Insect kit (Macherey-Nagel, Düren, Germany) as described elsewhere [57]. The 10 µL qPCR  
520 mixture consisted of 1× Xceed SG qPCR Mix Lo ROX (Institute of Applied Biotechnologies,  
521 Prague, Czech Republic), 400 nM of each forward and reverse primer (for *EkMasc/EkMascB*  
522 primers Masc\_F\_VIa and Masc\_R\_VI; for *EkAce-2* primers Ek\_Ace2\_F and Ek\_Ace2\_R), and 10  
523 ng of genomic DNA. Data was analyzed as described previously [39]. Briefly, the ratios  
524 between the target gene and the autosomal reference gene were calculated using the formula  
525  $R = [(1+E_{\text{Reference}})^{\text{CtReference}}]/[(1+E_{\text{Target}})^{\text{CtTarget}}]$ , where  $E$  is the primer efficiency and Ct the cycle  
526 threshold value. Two hypotheses were tested statistically by an unpaired two-tailed  $t$ -test for  
527 unequal variances: (i) the *EkMasc* and *EkMascB* genes are located on the Z chromosome (the  
528 expected female to male ratio is 0.5) and (ii) both genes are autosomal (the female to male  
529 ratio is 1). The male and female  $R$  values were either compared directly, or female values were  
530 multiplied by 2 to test both hypotheses. The average  $R$  value for females and males was  
531 calculated and plotted using R version 3.5.2 [58].

532

### 533 **Tissue-specific splicing of *Masc***

534 After identification of a splice variant encoding a truncated Masc protein, which lacks the two  
535 cysteine residues essential for masculinization, i.e. skipping exon VII, we tested the presence  
536 of this variant during different developmental stages in *E. kuehniella* females and males. This  
537 splice variant is referred to as masculinizing “domain” skipping *Masc* (*Masc<sup>ms</sup>*). For the  
538 embryonic stage, we used sexed embryos 16 hpo isolated for the *EkMasc* and *EkMascB*  
539 expression analysis (see below). In addition, RNA was isolated from single final instar larvae  
540 and single 2- or 3-day-old pupae using TRI Reagent. RNA was subsequently DNase-treated with  
541 the Invitrogen TURBO DNA-free Kit (Thermo Fisher) according to the manufacturer’s  
542 instructions, and 1 µg RNA was converted to cDNA using the ImProm-II Reverse Transcription  
543 System as described above. To test splice variation, we performed PCR using primers  
544 Masc\_bmd\_qF1 and Masc\_R\_X, and 1 µl of cDNA. The same PCR mix and profile were used as  
545 for the initial isolation of *EkMasc* and *EkMascB*. PCR products were visualized on a 1.5% TAE  
546 agarose gel stained with EtBr.

547 In addition, we tested whether the *Masc<sup>ms</sup>* splice variant was present in the testis  
548 and/or the rest of the body of *E. kuehniella*, *P. interpunctella* and *C. pomonella* (see S1  
549 Methods for identification of *Masc* in *C. pomonella*, primer design, and testes dissection). RNA  
550 was extracted and processed as described in the previous paragraph. The obtained cDNA  
551 samples were tested by PCR using primers qPiMasc\_F1 x qPiMasc\_R2 and CpMasc\_F4 x  
552 CpMasc\_R2 for *P. interpunctella* and *C. pomonella*, respectively. Samples of *E. kuehniella* were  
553 tested by PCR using primers Masc\_bmd\_qF1 x Masc\_R\_X. The PCR mix and thermocycling  
554 settings were the same as for the initial identification of *EkMasc* and *EkMascB*, and the PCR  
555 products were separated and visualized as described above. The non-sex-specific splice



556 variant of *PiMasc* was uploaded to Genbank (accession number MW505946). In addition, all  
557 obtained sequences of *PiMasc* and *CpMasc* were aligned and can be accessed at  
558 <https://easy.dans.knaw.nl/ui/datasets/...> (submitted).

559

#### 560 **PCR-based genetic sexing of *E. kuehniella***

561 Sexing of *E. kuehniella* can be done phenotypically in fifth instar larvae, pupae, and adults,  
562 however, sexing during embryogenesis and early larval stages is not possible. Therefore, we  
563 developed a PCR-based genetic sexing method for *E. kuehniella*. For this, DNA from three  
564 female and three male fifth instar larvae was isolated individually using the NucleoSpin DNA  
565 Insect kit (Macherey-Nagel). We observed that the primers Masc\_F1 and Masc\_R1 targeting  
566 *EkMasc* and *EkMascB* consistently showed off-target amplification in female samples,  
567 resulting in two bands in female samples and a single, expected band in male samples. We  
568 tested these primers at different annealing temperatures and found consistent results at  
569 temperatures ranging from 52–60°C with optimal results at 55°C. The 10 µL PCR mix contained  
570 0.2 µM of each primer, 0.2 mM dNTPs, 1× OneTaq Quick-Load reaction buffer, 0.025 units of  
571 OneTaq DNA polymerase (New England Biolabs), and 5 ng of DNA. The thermocycling profile  
572 consisted of 94°C for 3 min initial denaturation; 35 cycles of denaturation at 94°C for 30 s,  
573 annealing at 55°C for 30 s and extension at 68°C for 45 s; with a final extension at 68°C for 3  
574 min. This protocol was additionally confirmed using DNA samples from at least 20 adults, 10  
575 pupae and 10 larvae of the WT-C02 strain in multiple independent experiments.

576

#### 577 **Expression analysis of *EkMasc* and *EkMascB* during embryogenesis**

578 To measure the expression patterns of *EkMasc* and *EkMascB*, DNA and RNA was  
579 simultaneously isolated from single embryos at two-hour intervals, starting at 12 hpo and

580 ending at 24 hpo. RNA was isolated using TRI Reagent according the manufacturer's protocol  
581 and pellets were stored in ethanol at  $-80^{\circ}\text{C}$  until further use (see S1 Methods). DNA was  
582 simultaneously isolated from the organic phase using the back extraction protocol as  
583 described by Thermo Fisher Scientific (see S1 Methods for details). This DNA was used to  
584 determine the sex of the individual by PCR using sex-specific markers as described above. After  
585 sex determination by PCR, ethanol was removed from the corresponding RNA samples of  
586 three to six females and males, and RNA pellets were dissolved in 10  $\mu\text{L}$  of diethyl  
587 pyrocarbonate (DEPC)-treated water. The complete RNA samples were DNase-treated with  
588 the Invitrogen TURBO DNA-*free* Kit according to the manufacturer's instructions, and all RNA  
589 was used directly for conversion to cDNA using the ImProm-II Reverse Transcription System  
590 according to the manufacturer's instructions. The cDNA was prepared using a combination of  
591 Random Primers and Oligo(dT)<sub>15</sub> Primer (1:1) supplied with the kit, and with a concentration  
592 of 3 mM  $\text{MgCl}_2$ . All cDNA samples were diluted 3 $\times$  with nuclease-free water before use in qRT-  
593 PCR experiments.

594 qRT-PCR experiments were done on cDNA from the embryo samples using the gene  
595 *Ekrp49* as a reference to calculate relative expression levels (see S1 Methods for identification  
596 of *Ekrp49* and primer design for qRT-PCR). The experiments were performed as described  
597 above for qPCR, but 2  $\mu\text{L}$  of the 3 $\times$  diluted cDNA was used as a template. A minimum of three  
598 biological replicates per sex and time point were used and three technical replicates were  
599 used for each sample. Since the number of samples exceeded a single plate experiment, at  
600 least five samples (in triplicate) were repeated between plates to correct for between-plate  
601 variation, and different genes were measured on separate plates. Relative copy numbers were  
602 calculated according to the formula described above in Z-linkage of *EkMasc* and *EkMascB*  
603 using qPCR, for *EkMasc* and *EkMascB* separately. An unpaired two-tailed *t*-test with unequal

604 variances was used to test for significant differences in expression levels between sexes of the  
605 same age. Statistical analysis and visualization of the data were done using R version 3.5.2  
606 [58].

607

### 608 **Functional analysis of *EkMasc* and *EkMascB***

609 To assess the function of *EkMasc* and *EkMascB* in sex determination, two short interfering  
610 RNAs (siRNAs; see S3 Table) were designed to target *EkMasc* and *EkMascB* simultaneously,  
611 based on published recommendations [59, 60]. We tested two siRNAs, one targeting the start  
612 of the open reading frame (exon II) and one targeting the exon coding for the two cysteine  
613 residues essential for masculinization (exon VII) (see S1 Methods for details on siRNA design).  
614 Custom synthetic siRNA duplexes siMasc\_II and siMasc\_VII (see S3 Table for sequence details)  
615 were obtained from Sigma-Aldrich. The siRNA duplexes were dissolved in 100  $\mu$ L nuclease-  
616 free water, then the solution buffer contained 100 mM potassium acetate, 30 mM HEPES, and  
617 2 mM magnesium acetate. In addition, one siRNA published earlier [17], designed against GFP  
618 (siGFP), was used as a negative control. All siRNAs were injected individually, no combinations  
619 were tested.

620 Eggs were collected within the first hour after oviposition and injected using a  
621 FemtoJet Microinjector (Eppendorf, Hamburg, Germany) (see S1 Methods for details). DNA  
622 and RNA were isolated simultaneously from a subset of injected single embryos at 16 hpo (to  
623 test knock-down efficiency) or 48 hpo (to test *Ekdsx* splicing, see below) using TRI Reagent as  
624 described above in the expression analysis. DNA was used to sex the individuals, and  
625 subsequently RNA from a minimum of three confirmed WZ and three confirmed ZZ samples  
626 was converted to cDNA. Relative expression levels of *EkMasc* and *EkMascB* were measured  
627 and calculated using qRT-PCR as described in the expression analysis. Differences in *EkMasc*

628 and *EkMascB* expression levels between control and knock-down treatments were statistically  
629 tested by an unpaired one-tailed *t*-test for unequal variances, for both sexes separately.

630 Remaining eggs were left to develop and hatched approximately 7-10 days post  
631 injection. Larvae were transferred to artificial medium and left to develop until adulthood. The  
632 adults were phenotypically sexed and additionally assessed for potential abnormalities in  
633 reproductive organs, by dissection using a stereo microscope. In addition, heads of adults  
634 were used for CTAB DNA isolation (see above) and genetically sexed as described in section  
635 “Expression analysis of *EkMasc* and *EkMascB* during embryogenesis”. The observed adult sex  
636 ratios were tested for deviations from the expected sex ratio using the Pearson’s chi-squared  
637 test for goodness-of-fit with the expected frequency of 0.5 for both sexes.

638 To assess the effects of *Masc* knock-down on sex determination, splicing patterns of  
639 *doublesex* (*dsx*) are often used [17, 25]. Therefore, we identified a *dsx* ortholog in *E. kuehniella*,  
640 (see S1 Methods for details). Primers were designed using Geneious 9.1.6 in exons II and V,  
641 flanking the female-specific exons. PCR was done by using the mixture and thermocycling  
642 program described above, but with an annealing temperature of 60°C using primers  
643 *dsx\_dR\_F2* and *dsx\_dR\_R2* and cDNA from either female or male pupa samples. PCR products,  
644 run on a 1.5% TAE agarose gel stained with EtBr, showed alternative splicing between sexes.  
645 PCR products of both sexes were purified, cloned, and sequenced as described above. After  
646 confirmation of *Ekdsx* by sequencing, we used the same PCR conditions with cDNA from the  
647 embryo time series (see “Expression analysis of *EkMasc* and *EkMascB* during embryogenesis”)  
648 to identify the timing of sex-specific splicing of *Ekdsx* in *E. kuehniella*. We also used the same  
649 PCR on cDNA of a minimum of three WZ and ZZ embryos (of 48 hpo) injected with any of the  
650 three siRNAs to determine differential *Ekdsx* splicing. The products were run on a 1.5% TAE

651 agarose gel and stained with EtBr. All obtained *Ekdsx* sequences are included as an alignment  
652 and can be accessed at <https://easy.dans.knaw.nl/ui/datasets/...> (submitted).

653

#### 654 **Sliding window analysis of proline content in lepidopteran MASC proteins**

655 We compared all functionally confirmed lepidopteran Masc proteins to identify any other  
656 potentially conserved features/domains and we noticed a relatively high proline content in all  
657 lepidopteran Masc proteins. To identify patterns in the distribution of these proline residues,  
658 we used a sliding window approach. Therefore, we calculated the average proline content  
659 across a window of 25 amino acids (aa) and shifted the window by steps of 1 aa until the end  
660 of the protein using Microsoft Excel 2013. This process was performed for all functionally  
661 confirmed Masc protein sequences, i.e. *Bombyx mori* [17], *Trilocho varians* [21], *Agrotis ipsilon*  
662 [24], *Ostrinia furnacalis* [22], and *Plutella xylostella* [25], including EkMasc and EkMascB. An  
663 initial trial using window sizes of 10, 20, 25, and 50 aa showed that window size 25 aa was  
664 optimal for visualization of the data. The data were visualized using R version 3.5.2 [58] with  
665 the ggplot2 package [61], and domains were indicated using Inkscape 0.92  
666 (<https://inkscape.org/>).

667

#### 668 **Supporting information**

669 **S1 Table. Significance test of *EkMasc* and *EkMascB* expression level comparison between**  
670 **sexes during embryogenesis in *Ephestia kuehniella*.** An unpaired two-tailed *t*-test for unequal  
671 variances was used. Expression levels significantly differing from each other between sexes (*P*  
672 < 0.05) are indicated in bold.

673 (PDF)

674 **S2 Table. Significance test of knock-down effects of siRNA treatments in *Ephestia kuehniella***  
675 **using an unpaired one-tailed *t*-test for unequal variances.** Expression levels significantly  
676 differing from each other between treatments ( $P < 0.05$ ) are indicated in bold.

677 (PDF)

678 **S3 Table. Overview of primers and siRNAs used in this study.**

679 (PDF)

680 **S1 Fig. *EkMasc* and *EkMascB* Z-linkage assessed by qPCR using genomic DNA of *Ephestia***  
681 ***kuehniella*.** Relative copy numbers were assessed for female and male samples ( $n = 3$  for both  
682 sexes). Indicated are hypothetical *EkMasc* and *EkMascB* female to male ratios relative to male  
683 copy numbers corresponding to the autosomal hypothesis (both *EkMasc* and *EkMascB* located  
684 on autosomes; F:M ratio = 1.00), and the Z chromosomal hypothesis (F:M ratio = 0.50). Error  
685 bars indicates standard deviation.

686 (PDF)

687 **S2 Fig. Southern blot assay using *EkMasc* probe in *Ephestia kuehniella*.** Two signals can be  
688 identified in the genomic DNA of both female and male samples double digested with (1) *NdeI*  
689  $\times$  *NotI*, (2) *DraI*  $\times$  *NheI*, and (3) *AgeI*  $\times$  *BspHI*. Arrows indicate highly diffused bands. Note that  
690 female signals are weaker than male signals. Indicated are the marker (M) in bp, female ( $\text{\textcircled{f}}$ )  
691 and male ( $\text{\textcircled{m}}$ ) samples.

692 (PDF)

693 **S3 Fig. Exon-intron map of the *EkMasc* and *EkMascB* genes in *Ephestia kuehniella*.** Two poly-  
694 adenylation sites are indicated for each gene, as well as the open reading frame (grey)  
695 including the start (ATG) and stop codon (\*). Additionally indicated is the splice variant  
696 skipping exon VII (dashed grey line) and its corresponding premature stop codon (grey \*).

697 (PDF)

698 **S4 Fig. Protein alignment of EkMasc and EkMascB of *Ephestia kuehniella*.** Indicated in the  
699 alignment are the conserved bipartite nuclear localization signal (bNLS; green) and the  
700 masculinizing domain (MD; blue). Also indicated are deletions (red arrows) and insertions  
701 (cyan arrows) in either EkMasc or EkMascB based on comparison to the Masc protein  
702 sequence of the closely related *Plodia interpunctella*. A single grey arrow (at amino acid 31)  
703 indicates an indel between EkMasc and EkMascB that cannot be categorized as a deletion or  
704 an insertion in either protein sequence based on the Masc protein sequence of *P.*  
705 *interpunctella*.

706 (PDF)

707 **S5 Fig. Genetic sexing of *Ephestia kuehniella*.** Note the two bands in female samples.  
708 Indicated are marker (M) in kb, no template control (NTC), female (♀) and male (♂) samples.

709 (PDF)

710 **S6 Fig. Illustrative set-up of the RNAi experiments in *Ephestia kuehniella*.** Indicated in the  
711 figure are the degenerated zinc finger motifs (pink boxes) upstream of the open reading  
712 frame, the bipartite nuclear localization signal (green box), the male determining region (blue  
713 box), the open reading frame (yellow) and the two siRNAs targeting *EkMasc* and *EkMascB* (red  
714 dashed lines). Also shown is an exon representation of the genes.

715 (PDF)

716 **S7 Fig. Splicing pattern of *Ekdsx* in *Ephestia kuehniella*.** (A) Schematic representation of  
717 female- (pink line) and male-specific (blue line) splicing patterns of *Ekdsx*. Indicated below the  
718 figure are the targets of the primers used throughout the article (F and R). (B) The two  
719 dominant female- and the dominant male-specific transcripts and their predicted respective  
720 open reading frames (in grey/pink). (C) Sex-specific splicing of *Ekdsx* as detected by the  
721 primers indicated in A. A currently uncharacterized third female-specific splice variant is also

722 visible (the top arrow). **(D)** Sex-specific splicing pattern of *Ekdsx* during early development in  
723 WZ (left) and ZZ (right) individuals. Note transitions of *Ekdsx* splicing from female-specific to  
724 male-specific in ZZ individuals only, 16–18 hours post oviposition (hpo). Indicated are marker  
725 (M) in kb, and no template control (NTC).

726 (PDF)

727 **S8 Fig. Alignment of functionally confirmed Masc proteins in six lepidopteran species.** The  
728 alignment shows low levels of amino acid homology even within the functional domains.  
729 Indicated below the alignment are the conserved zinc finger domains (ZF1 & ZF2; pink), the  
730 bipartite nuclear localization signal (bNLS; green) and the masculinizing domain (MD; blue).  
731 Aligned are the Masc protein sequences of *Bombyx mori* (Bm), *Trilocho varians* (Tv), *Agrotis*  
732 *ipsilon* (Ai), *Ostrinia furnacalis* (Of), *Plutella xylostella* (Pxy), and *Ephestia kuehniella* (Ek).

733 (PDF)

734 **S9 Fig. Sliding window analysis of proline content for EkMasc and EkMascB proteins in**  
735 ***Ephestia kuehniella*.** Note that the proline distribution in both proteins is very similar.

736 (PDF)

737 **S10 Fig. Protein alignment of zinc finger protein 2 (ZNF-2) of *Bombyx mori* (Bm) and the**  
738 **predicted ortholog in *Ephestia kuehniella* (Ek).** Indicated in pink are the two zinc finger  
739 domains (ZF1 and ZF2), and in blue two cysteine amino acids separated by two amino acids  
740 similar to the masculinizing domain in lepidopteran Masc proteins.

741 (PDF)

742 **S1 Methods.**

743 (PDF)

744

745 **Acknowledgments**



746 We thank Marie Korchová for excellent technical assistance and Joanna Kotwica-Rolinska for  
747 providing technical help with microinjections. We also thank Arjen van't Hof and Atsuo  
748 Yoshido for their valuable comments on the manuscript. Computational resources were  
749 supplied by the project "e-Infrastruktura CZ" (e-INFRA LM2018140) provided within the  
750 program Projects of Large Research, Development and Innovations Infrastructures.

751

## 752 **Author Contributions**

753 Conceived and designed the experiments: SV, ECV, FM. Performed the experiments and  
754 analyzed the data: SV. Assembled the genome of *Ephestia kuehniella*: AV, PN. Funding  
755 acquisition: FM. Wrote the paper: SV, ECV, FM.

756

757 **Data Availability Statement:** The raw Nanopore PromethION long reads from an *Ephestia*  
758 *kuehniella* male generated in this study have been deposited in the Sequence Read Archive  
759 under accession number PRJNA683200. All splice variants of the *EkMasc* and *EkMascB* genes  
760 and all obtained sequences of the *PiMasc*, *CpMasc*, and *Ekdsx* genes are available at  
761 <https://easy.dans.knaw.nl/ui/datasets/...> (submitted).

762

763 **Funding:** This research was funded by the European Union's Horizon 2020 research and  
764 innovation program under the Marie Skłodowska-Curie grant agreement No. 641456 and by  
765 grant 20-13784S of the Czech Science Foundation (CSF). AV and PN were supported by CSF  
766 grant 20-20650Y. The funders had no role in study design, data collection and analysis,  
767 decision to publish, or preparation of the manuscript.

768

769 **Competing interests:** The authors have declared that no competing interests exist.

770

## 771 **References**

- 772 1. Nöthiger R, Steinmann-Zwicky M. A single principle for sex determination in insects. Cold  
773 Spring Harbor Symp Quant Genet. 1985; 50:615–621. doi: 10.1101/sqb.1985.050.01.074
- 774 2. Wilkins AS. Moving up the hierarchy: A hypothesis on the evolution of a genetic sex  
775 determination pathway. BioEssays. 1995; 17(1):71–77. doi: 10.1002/bies.950170113
- 776 3. Verhulst EC, van de Zande L, Beukeboom LW. Insect sex determination: it all evolves  
777 around transformer. Curr Opin Genet Dev. 2010; 20(4):376–383. doi:  
778 10.1016/j.gde.2010.05.001
- 779 4. Gempe T, Beye M. Function and evolution of sex determination mechanisms, genes and  
780 pathways in insects. BioEssays. 2011; 33(1):52–60. doi: 10.1002/bies.201000043
- 781 5. Bopp D, Saccone G, Beye M. Sex determination in insects: variations on a common theme.  
782 Sex Dev. 2014; 8(1–3):20–28. doi: 10.1159/000356458
- 783 6. Geuverink E, Beukeboom LW. Phylogenetic distribution and evolutionary dynamics of the  
784 sex determination genes doublesex and transformer in insects. Sex Dev. 2014; 8(1-3):38–  
785 49. doi: 10.1159/000357056
- 786 7. Nguantad S, Chumnanpuen P, Thancharoen A, Vongsangnak W, Sriboonlert A.  
787 Identification of potential candidate genes involved in the sex determination cascade in  
788 an aquatic firefly, *Sclerotia aquatilis* (Coleoptera, Lampyridae). Genomics. 2020;  
789 112(3):2590–2602. doi: 10.1016/j.ygeno.2020.01.025
- 790 8. Zou Y, Geuverink E, Beukeboom LW, Verhulst EC, van de Zande L. A chimeric gene  
791 paternally instructs female sex determination in the haplodiploid wasp *Nasonia*. Science.  
792 2020; 370(6520):1115–1118. doi: 10.1126/science.abb8949

- 793 9. Beye M, Hasselmann M, Fondrk MK, Page RE, Omholt SW. The gene *csd* is the primary  
794 signal for sexual development in the honeybee and encodes an SR-type protein. *Cell*.  
795 2003; 114(4):419–429. doi: 10.1016/s0092-8674(03)00606-8
- 796 10. Hasselmann M, Gempe T, Schiøtt M, Nunes-Silva CG, Otte M, Beye M. Evidence for the  
797 evolutionary nascence of a novel sex determination pathway in honeybees. *Nature*. 2008;  
798 454(7203):519–522. doi: 10.1038/nature07052
- 799 11. Jia LY, Xiao JH, Xiong TL, Niu LM, Huang DW. The transformer genes in the fig wasp  
800 *Ceratosolen solmsi* provide new evidence for duplications independent of complementary  
801 sex determination. *Insect Mol Biol*. 2016; 25(3):191–201. doi: 10.1111/imb.12210
- 802 12. Geuverink E, Kraaijeveld K, van Leussen M, Chen F, Pijpe J, Linskens MHK, et al. Evidence  
803 for involvement of a transformer paralogue in sex determination of the wasp *Leptopilina*  
804 *clavipes*. *Insect Mol Biol*. 2018; 27(6):780–95. doi: 10.1111/imb.12522
- 805 13. Sharma A, Heinze SD, Wu Y, Kohlbrenner T, Morilla I, Brunner C, et al. Male sex in  
806 houseflies is determined by *Mdmd*, a paralog of the generic splice factor gene *CWC22*.  
807 *Science*. 2017; 356(6338):642–645. doi: 10.1126/science.aam5498
- 808 14. Furlong MJ, Wright DJ, Dosdall LM. Diamondback moth ecology and management:  
809 problems, progress, and prospects. *Annu Rev Entomol*. 2013; 58:517–541. doi:  
810 10.1146/annurev-ento-120811-153605
- 811 15. Suzuki MG. Sex determination: insights from the silkworm. *J Genet*. 2010; 89(3):357–363.  
812 doi: 10.1007/s12041-010-0047-5
- 813 16. Katsuma S, Kawamoto M, Kiuchi T. Guardian small RNAs and sex determination. *RNA Biol*.  
814 2014; 11(10):1238–1242. doi: 10.1080/15476286.2014.996060

- 815 17. Kiuchi T, Koga H, Kawamoto M, Shoji K, Sakai H, Arai Y, et al. A single female-specific piRNA  
816 is the primary determiner of sex in the silkworm. *Nature*. 2014; 509(7502):633–636. doi:  
817 10.1038/nature13315
- 818 18. Sugano Y, Kokusho R, Ueda M, Fujimoto M, Tsutsumi N, Shimada T, et al. Identification of  
819 a bipartite nuclear localization signal in the silkworm Masc protein. *FEBS Lett*. 2016;  
820 590(14):2256–2261. doi: 10.1002/1873-3468.12246
- 821 19. Katsuma S, Sugano Y, Kiuchi T, Shimada T. Two conserved cysteine residues are required  
822 for the masculinizing activity of the silkworm Masc protein. *J Biol Chem*. 2015;  
823 290(43):26114–26124. doi: 10.1074/jbc.M115.685362
- 824 20. Kiuchi T, Sugano Y, Shimada T, Katsuma S. Two CCCH-type zinc finger domains in the Masc  
825 protein are dispensable for masculinization and dosage compensation in *Bombyx mori*.  
826 *Insect Biochem Mol Biol*. 2019; 104:30–38. doi: 10.1016/j.ibmb.2018.12.003
- 827 21. Lee J, Kiuchi T, Kawamoto M, Shimada T, Katsuma S. Identification and functional analysis  
828 of a Masculinizer orthologue in *Trilocha varians* (Lepidoptera: Bombycidae). *Insect Mol*  
829 *Biol*. 2015; 24(5):561–569. doi: 10.1111/imb.12181
- 830 22. Fukui T, Kawamoto M, Shoji K, Kiuchi T, Sugano S, Shimada T, et al. The endosymbiotic  
831 bacterium *Wolbachia* selectively kills male hosts by targeting the masculinizing gene. *PLoS*  
832 *Pathog*. 2015; 11(7):e1005048. doi: 10.1371/journal.ppat.1005048
- 833 23. Fukui T, Kiuchi T, Shoji K, Kawamoto M, Shimada T, Katsuma S. In vivo masculinizing  
834 function of the *Ostrinia furnacalis* Masculinizer gene. *Biochem Biophys Res Commun*.  
835 2018; 503(3):1768–1772. doi: 10.1016/j.bbrc.2018.07.111
- 836 24. Wang YH, Chen XE, Yang Y, Xu J, Fang GQ, Niu CY, et al. The Masc gene product controls  
837 masculinization in the black cutworm, *Agrotis ipsilon*. *Insect Sci*. 2019; 26(6):1037–1044.  
838 doi: 10.1111/1744-7917.12635

- 839 25. Harvey-Samuel T, Norman VC, Carter R, Lovett E, Alphey L. Identification and  
840 characterization of a Masculinizer homologue in the diamondback moth, *Plutella*  
841 *xylostella*. *Insect Mol Biol*. 2020; 29(2):231–240. doi: 10.1111/imb.12628
- 842 26. Katsuma S, Shoji K, Sugano Y, Suzuki Y, Kiuchi T. Masc-induced dosage compensation in  
843 silkworm cultured cells. *FEBS Open Bio*. 2019; 9(9):1573–1579. doi: 10.1002/2211-  
844 5463.12698
- 845 27. Robinson R. *Lepidoptera genetics*. 1st ed. Oxford: Pergamon Press; 1971.
- 846 28. Traut W, Sahara K, Marec F. Sex chromosomes and sex determination in *Lepidoptera*. *Sex*  
847 *Dev*. 2007; 1(6):332–346. doi: 10.1159/000111765
- 848 29. Champ BR, Dyte CE. FAO global survey of pesticide susceptibility of stored grain pests. *FAO*  
849 *Plant Protection Bulletin*. 1977; 25(2):49–67.
- 850 30. Vangansbeke D, Nguyen DT, Audenaert J, Verhoeven R, Gobin B, Tirry L, et al. Performance  
851 of the predatory mite *Amblydromalus limonicus* on factitious foods. *BioControl*. 2014;  
852 59(1):67–77. doi: 10.1007/s10526-013-9548-5
- 853 31. St-Onge M, Cormier D, Todorova S, Lucas É. Conservation of *Epehestia kuehniella* eggs as  
854 hosts for *Trichogramma ostriniae*. *J Appl Entomol*. 2016; 140(3):218–222. doi:  
855 10.1111/jen.12227
- 856 32. Bueno VHP, Montes FC, Sampaio MV, Calixto AM, van Lenteren JC. Performance of  
857 immatures of three Neotropical Miridae at five different temperatures, reared on  
858 *Epehestia kuehniella* eggs on tobacco plants. *Bull Insectology*. 2018; 71(1):77–87.
- 859 33. Cox PD, Mfon M, Parkin S, Seaman JE. Diapause in a Glasgow strain of the flour moth,  
860 *Epehestia kuehniella*. *Physiol Entomol*. 1981; 6(4):349–356. doi: 10.1111/j.1365-  
861 3032.1981.tb00650.x

- 862 34. Cerutti F, Bigler F, Eden G, Bosshart S. Optimal larval density and quality control aspects  
863 in mass rearing of the Mediterranean flour moth, *Ephestia kuehniella* Zell. (Lep.,  
864 Phycitidae). *J Appl Entomol.* 1992; 114(1-5):353–361. doi: 10.1111/j.1439-  
865 0418.1992.tb01139.x
- 866 35. Xu J, Wang Q. Male moths undertake both pre- and in-copulation mate choice based on  
867 female age and weight. *Behav Ecol Sociobiol.* 2009; 63(6):801–808. doi: 10.1007/s00265-  
868 009-0713-x
- 869 36. Traut W, Rathjens B. Das W-Chromosom von *Ephestia kuehniella* (Lepidoptera) und die  
870 Ableitung des Geschlechtschromatins. *Chromosoma.* 1973; 41(4):437–446. doi:  
871 10.1007/BF00396501
- 872 37. Nguyen P, Sýkorová M, Šíchová J, Kůta V, Dalíková M, Čapková Frydrychová R, et al. Neo-  
873 sex chromosomes and adaptive potential in tortricid pests. *Proc Natl Acad Sci U S A.* 2013;  
874 110(17):6931–6936. doi: 10.1073/pnas.1220372110
- 875 38. Van't Hof AE, Nguyen P, Dalíková M, Edmonds N, Marec F, Saccheri IJ. Linkage map of the  
876 peppered moth, *Biston betularia* (Lepidoptera, Geometridae): a model of industrial  
877 melanism. *Heredity.* 2013; 110(3):283–295. doi: 10.1038/hdy.2012.84
- 878 39. Dalíková M, Zrzavá M, Hladová I, Nguyen P, Šonský I, Flegrová M, et al. New insights into  
879 the evolution of the W chromosome in Lepidoptera. *J Hered.* 2017; 108(7):709–719. doi:  
880 10.1093/jhered/esx063
- 881 40. Suzuki MG, Ohbayashi F, Mita K, Shimada T. The mechanism of sex-specific splicing at the  
882 doublesex gene is different between *Drosophila melanogaster* and *Bombyx mori*. *Insect*  
883 *Biochem Mol Biol.* 2001; 31(12):1201–1211. doi: 10.1016/s0965-1748(01)00067-4
- 884 41. Shukla JN, Jadhav S, Nagaraju J. Novel female-specific splice form of *dsx* in the silkworm,  
885 *Bombyx mori*. *Genetica.* 2011; 139(1):23–31. doi: 10.1007/s10709-010-9479-3

- 886 42. Chang AY, Liao BY. Reduced translational efficiency of eukaryotic genes after duplication  
887 events. *Mol Biol Evol.* 2020; 37(5):1452–1461. doi: 10.1093/molbev/msz309
- 888 43. Zhao Q, Li J, Wen MY, Wang H, Wang Y, Wang KX, et al. A novel splice variant of the  
889 masculinizing gene *Masc* with piRNA-cleavage-site defect functions in female external  
890 genital development in the silkworm, *Bombyx mori*. *Biomolecules.* 2019; 9(8):318. doi:  
891 10.3390/biom9080318
- 892 44. Gopinath G, Arunkumar KP, Mita K, Nagaraju J. Role of *Bmzmf-2*, a *Bombyx mori* CCCH zinc  
893 finger gene, in masculinisation and differential splicing of *Bmtra-2*. *Insect Biochem Mol*  
894 *Biol.* 2016; 75:32–44. doi: 10.1016/j.ibmb.2016.05.008
- 895 45. Gerber HP, Seipel K, Georgiev O, Höfferer M, Hug M, Rusconi S, et al. Transcriptional  
896 activation modulated by homopolymeric glutamine and proline stretches. *Science (New*  
897 *York, NY).* 1994; 263(5148):808–811. doi: 10.1126/science.8303297
- 898 46. Williamson MP. The structure and function of proline-rich regions in proteins. *Biochem J.*  
899 1994; 297:249–260. doi: 10.1042/bj2970249
- 900 47. Marec F. Genetic control of pest Lepidoptera: induction of sex-linked recessive lethal  
901 mutations in *Ephestia kuehniella* (Pyralidae). *Acta Entomol Bohemoslov.* 1990; 87(6):445–  
902 458.
- 903 48. Fuková I, Nguyen P, Marec F. Codling moth cytogenetics: karyotype, chromosomal  
904 location of rDNA, and molecular differentiation of sex chromosomes. *Genome.* 2005;  
905 48(6):1083–1092. doi: 10.1139/G05-063
- 906 49. Challis RJ, Kumar S, Dasmahapatra KK, Jiggins CD, Blaxter M. Lepbase: the Lepidopteran  
907 genome database. *bioRxiv.* 2016. doi: 10.1101/056994
- 908 50. Kearse M, Moir R, Wilson A, Stones-Havas S, Cheung M, Sturrock S, et al. Geneious Basic:  
909 an integrated and extendable desktop software platform for the organization and analysis

- 910 of sequence data. *Bioinformatics*. 2012; 28(12):1647-1649. doi:  
911 10.1093/bioinformatics/bts199
- 912 51. Frohman MA, Dush MK, Martin GR. Rapid production of full-length cDNAs from rare  
913 transcripts: amplification using a single gene-specific oligonucleotide primer. *Proc Natl*  
914 *Acad Sci U S A*. 1988; 85(23):8998–9002. doi: 10.1073/pnas.85.23.8998
- 915 52. Ferguson KB, Visser S, Dalíková M, Provazníková I, Urbaneja A, Pérez-Hedo M, et al. Jekyll  
916 or Hyde? The genome (and more) of *Nesidiocoris tenuis*, a zoophytophagous predatory  
917 bug that is both a biological control agent and a pest. *Insect Mol Biol*. First published: 11  
918 December 2020. doi: 10.1111/imb.12688
- 919 53. Buntrock L, Marec F, Krueger S, Traut W. Organ growth without cell division: somatic  
920 polyploidy in a moth, *Ephestia kuehniella*. *Genome*. 2012; 55:755–763. doi:  
921 10.1139/g2012-060
- 922 54. Koren S, Walenz BP, Berlin K, Miller JR, Bergman NH, Phillippy AM. Canu: scalable and  
923 accurate long-read assembly via adaptive k-mer weighting and repeat separation.  
924 *Genome Res*. 2017; 27(5):722–736. doi: 10.1101/gr.215087.116
- 925 55. Frydrychová R, Marec F. Repeated losses of TTAGG telomere repeats in evolution of  
926 beetles (Coleoptera). *Genetica*. 2002; 115(2):179–187. doi: 10.1023/A:1020175912128
- 927 56. Dalíková M, Zrzavá M, Kubíčková S, Marec F. W-enriched satellite sequence in the Indian  
928 meal moth, *Plodia interpunctella* (Lepidoptera, Pyralidae). *Chromosome Res*. 2017; 25(3–  
929 4):241–252. doi: 10.1023/A:1020175912128
- 930 57. Hejníčková M, Koutecký P, Potocký P, Provazníková I, Voleníková A, Dalíková M, et al.  
931 Absence of W chromosome in Psychidae moths and implications for the theory of sex  
932 chromosome evolution in Lepidoptera. *Genes*. 2019; 10(12):1016. doi:  
933 10.3390/genes10121016



- 934 58. R Core Team (2018). R: A language and environment for statistical computing. R  
935 Foundation for Statistical Computing, Vienna, Austria. URL [https://www.R-](https://www.R-project.org/)  
936 [project.org/](https://www.R-project.org/).
- 937 59. Elbashir SM, Martinez J, Patkaniowska A, Lendeckel W, Tuschl T. Functional anatomy of  
938 siRNAs for mediating efficient RNAi in *Drosophila melanogaster* embryo lysate. *EMBO J.*  
939 2001; 20(23):6877–6888. doi: 10.1093/emboj/20.23.6877
- 940 60. Pei Y, Tuschl T. On the art of identifying effective and specific siRNAs. *Nat Methods.* 2006;  
941 3(9):670–676. doi: 10.1038/nmeth911
- 942 61. Wickham H. *ggplot2: Elegant graphics for data analysis.* 2nd ed. New York: Springer-  
943 Verlag; 2016.
- 944

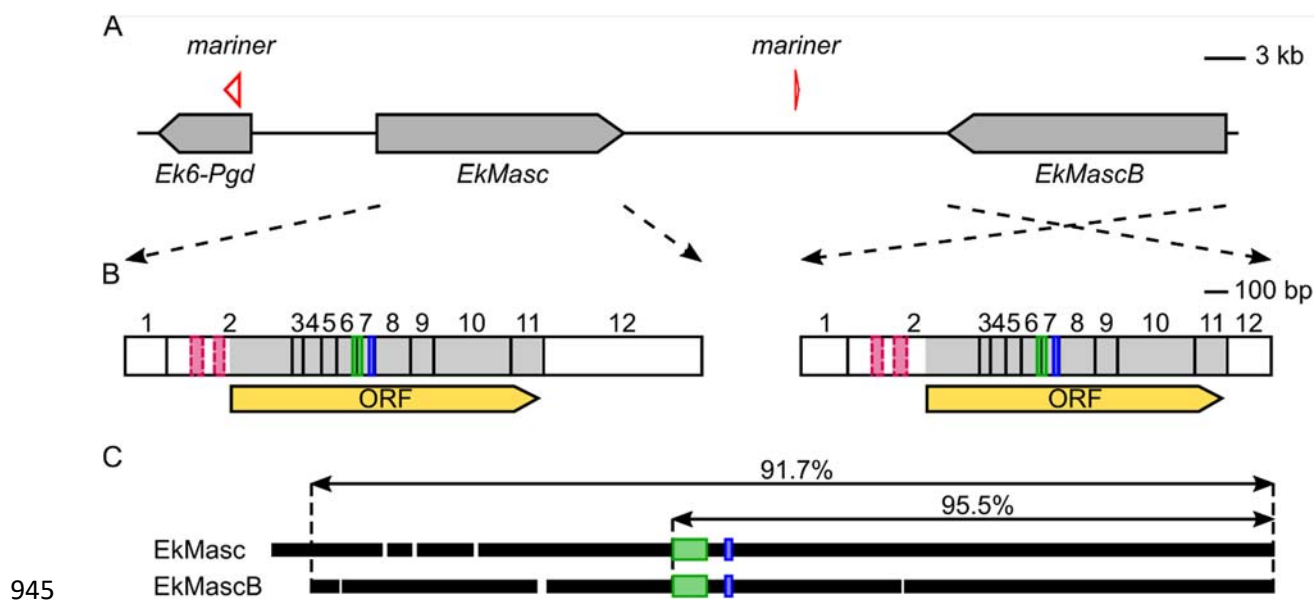

946 **Fig 1. Genomic organization of *EkMasc* and *EkMascB* genes in *Ephestia kuehniella*.** (A)

947 Graphical representation of *EkMasc* and *EkMascB* on the assembled scaffold with an ortholog

948 of the *6-Pgd* gene (*Ek6-Pgd*) upstream of *EkMasc* and two inactive mariner transposase genes.

949 (B) Representation of complete transcripts of *EkMasc* and *EkMascB* with the exons, open

950 reading frame (ORF; yellow), bipartite nuclear localization signal (bNLS; green), masculinizing

951 domain (blue), and degenerated zinc finger domains in exon 2 (dashed pink) indicated. (C)

952 Alignment of the *EkMasc* and *EkMascB* protein sequences showing the amount of homology

953 between the two proteins, white spaces are indels, green and blue boxes represent the bNLS

954 and masculinizing domains, respectively.

955

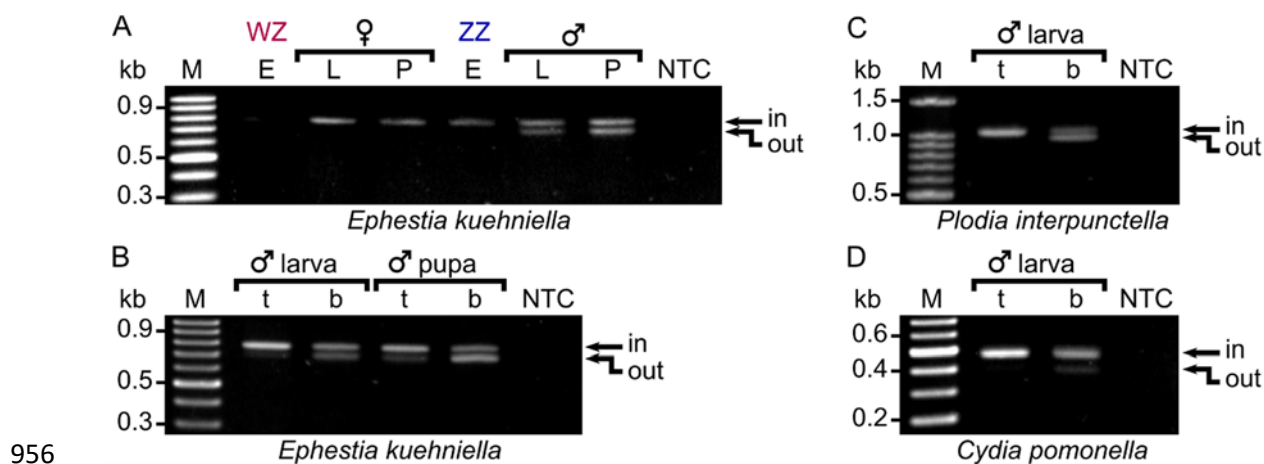

957 **Fig 2. Alternative splicing of Masc in different life stages of *Ephestia kuehniella* and different**  
 958 **tissues in *E.kuehniella*, *Plodia interpunctella*, and *Cydia pomonella*.** (A) Alternative splicing  
 959 of *EkMasc* and *EkMascB* in WZ and ZZ samples of different life stages, embryo 16 hpo (E), larva  
 960 (L), and pupa (P), where the exon containing the masculinization domain (exon VII) is either  
 961 spliced in or spliced out. (B) Male testis (t) and whole body samples minus the testis (b) show  
 962 different splicing patterns in *E. kuehniella* with the testis sample showing predominantly  
 963 splicing-in of exon VII in both larva and pupa stage, and the body samples showing both splice  
 964 types. This splice pattern is conserved in males of the closely related *P. interpunctella* (C) and  
 965 the more distant *C. pomonella* (D).

966

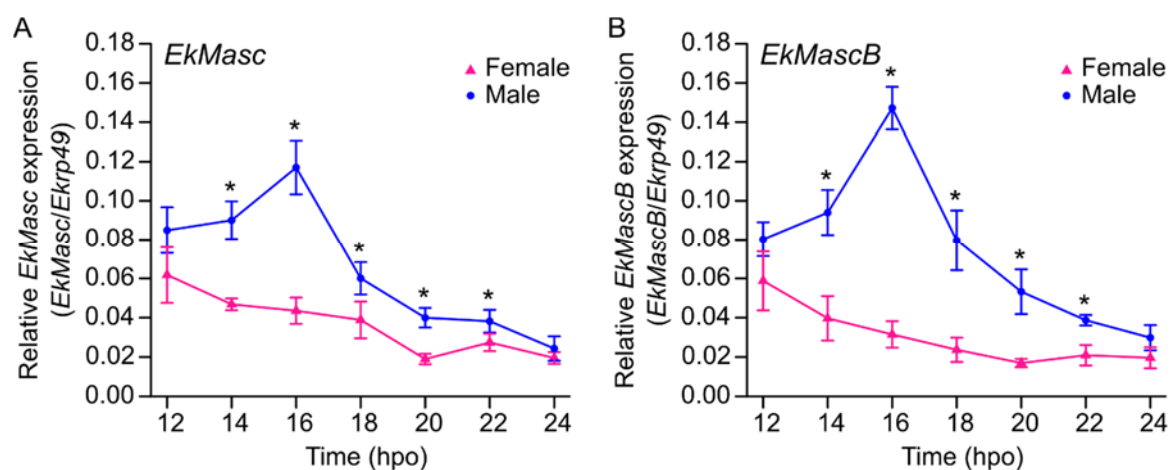

967

968 **Fig 3. Expression of *EkMasc* (A) and *EkMascB* (B) during early embryogenesis in female (pink)**

969 **and male (blue) samples of *Ephestia kuehniella*.** Each time point has at least 3 biological

970 replicates. Significant differences between sexes are indicated (\*; unpaired two-tailed *t*-test;

971  $P < 0.05$ ) and errors bars indicate standard deviation.

972

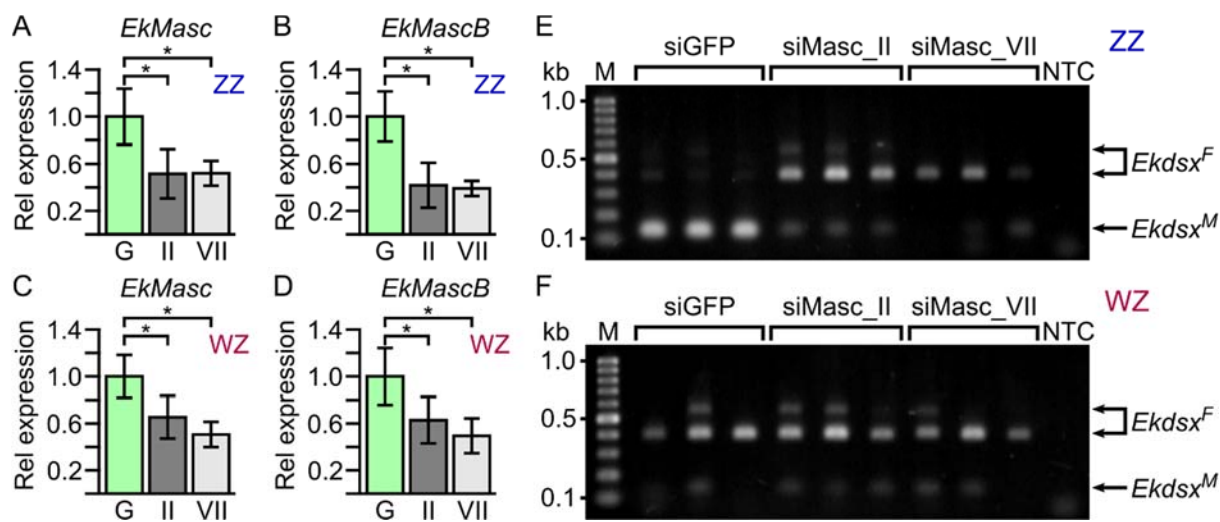

973

974 **Fig 4. RNAi knock-down effects in ZZ and WZ *Ephestia kuehniella* individuals 16 hours post**

975 **oviposition.** The fold-change in expression levels of *EkMasc* (A and C) and *EkMascB* (B and D)

976 in ZZ (A and B) and WZ (C and D) individuals injected with siMasc\_II (si\_II) or siMasc\_VII (si\_VII)

977 are shown relative to the control injected (siGFP) individuals. Statistically significant

978 differences are indicated by \* (unpaired one-tailed *t*-test;  $P < 0.05$ ; S2 Table), error bars

979 indicate standard deviation. In E and F, effects of sex-specific splicing of *Ekdsx* 48 hpo after

980 injection with control, siMasc\_II, and siMasc\_VII are shown in ZZ and WZ individuals,

981 respectively. Note that splicing of *Ekdsx* shifts from predominantly male-specific in the control

982 to mostly female-specific in siMasc\_II- and siMasc\_VII-treated ZZ individuals (E), while splicing

983 does not differ between treatments in WZ individuals (F).

984

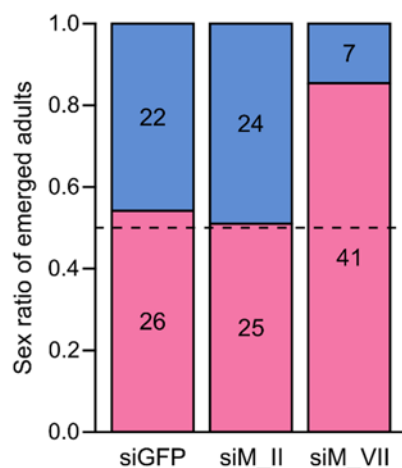

985

986 **Fig 5. Sex ratio of emerged *Ephestia kuehniella* adults injected as 1–2 hpo embryos with**  
987 **siGFP, siMasc\_II (siM\_II), and siMasc\_VII (siM\_VII).** The number of adult females (pink) and  
988 males (blue) emerged in each treatment are indicated in the figure. The sex ratio (f : m) of  
989 emerged adults injected with siGFP or siMasc\_II is approximately 0.5 (indicated by a dashed  
990 line), while the sex ratio of siMasc\_VII-injected individuals is strongly female-biased (> 0.8).

991

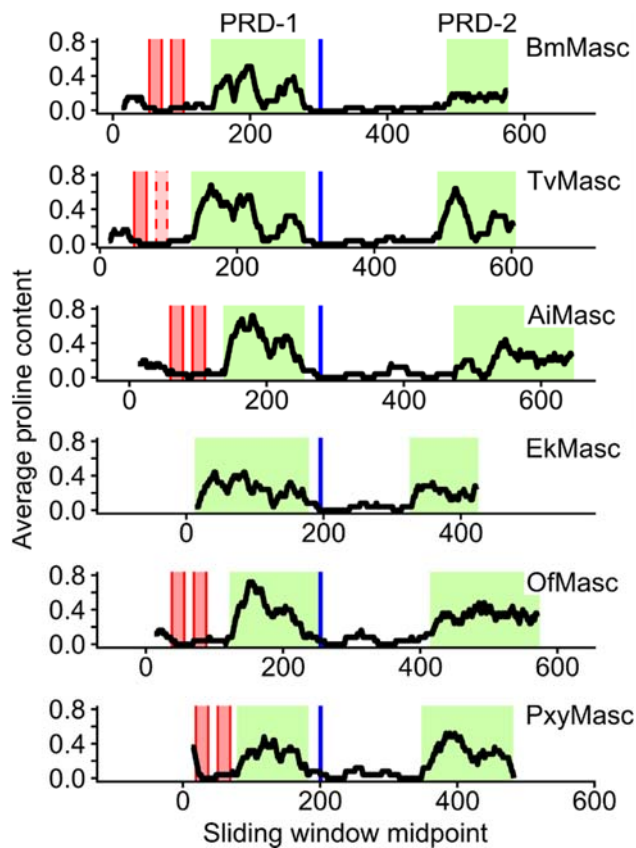

992

993 **Fig 6. Sliding window analysis of proline distribution in functionally confirmed Masc proteins**

994 **of six lepidopteran species.** Sliding window analysis revealed two regions in all Masc proteins

995 with increased proline content, proline-rich domain 1 (PRD-1) and proline-rich domain 2 (PRD-

996 2) (shaded green). Graphs are aligned by the masculinizing domain (blue). Also indicated are

997 the two zinc finger domains (shaded red with solid outline), the second zinc finger domain in

998 TvMasc has a dashed outline due to a deletion potentially resulting in the loss of the domain.

999 Species used for this analysis: *Bombyx mori* (Bm), *Trilocho varians* (Tv), *Agrotis ipsilon* (Ai),

1000 *Ephestia kuehniella* (Ek), *Ostrinia furnacalis* (Of), and *Plutella xylostella* (Pxy).

1001

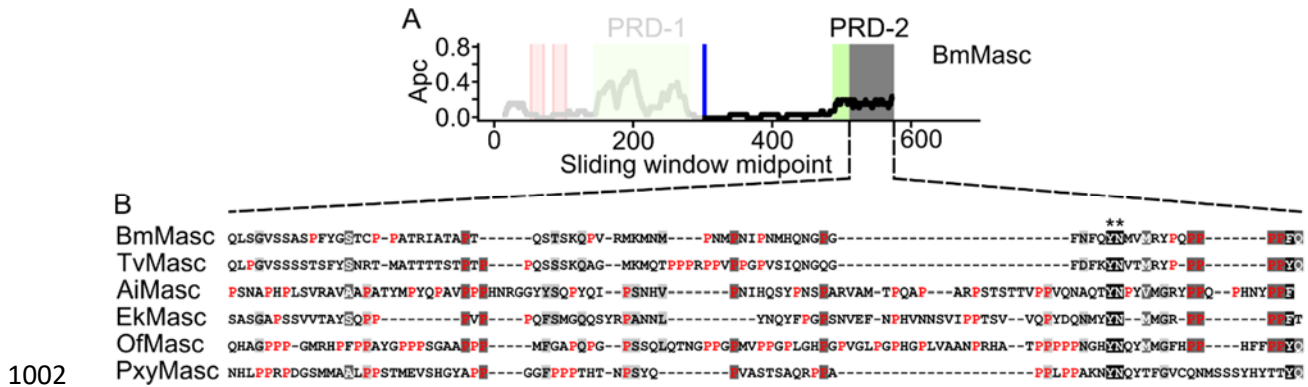

1002

1003 **Fig 7. Analysis of the terminal region essential for BmMasc function as identified in Katsuma**

1004 **et al. (2015).** In addition to the masculinizing domain (blue), the shaded grey region in (A)

1005 shows a region essential for Masc protein function, coinciding with the proline-rich domain 2

1006 (PRD-2) (green). This region of BmMasc was aligned to the functionally confirmed Masc

1007 protein sequences in other Lepidoptera (B). Apart from a tyrosine-asparagine motif (\*\*),

1008 which is conserved in all species, the only conserved feature of this region is the relatively high

1009 proline (red) content. APC, average proline content. Species used for this analysis: *Bombyx*

1010 *mori* (Bm), *Trilocho varians* (Tv), *Agrotis ipsilon* (Ai), *Epehestia kuehniella* (Ek), *Ostrinia*

1011 *furnacalis* (Of), and *Plutella xylostella* (Pxy).



## Supporting information for

### **A conserved role of the duplicated *Masculinizer* gene in sex determination of the Mediterranean flour moth, *Ephestia kuehniella***

Sander Visser, Anna Voleníková, Petr Nguyen, Eveline C. Verhulst, František Marec\*

\*Corresponding author: [marec@entu.cas.cz](mailto:marec@entu.cas.cz)

**The PDF file includes:**

- S1 Table
- S2 Table
- S3 Table
- S1 Fig
- S2 Fig
- S3 Fig
- S4 Fig
- S5 Fig
- S6 Fig
- S7 Fig
- S8 Fig
- S9 Fig
- S10 Fig
- S1 Methods

**S1 Table. Significance test of *EkMasc* and *EkMascB* expression level comparison between sexes during embryogenesis in *Ephestia kuehniella*.** An unpaired two-tailed *t*-test for unequal variances was used. Expression levels significantly differing from each other between sexes ( $P < 0.05$ ) are indicated in bold.

| Time point (hpo) | <i>P</i> -value |                 |
|------------------|-----------------|-----------------|
|                  | <i>EkMasc</i>   | <i>EkMascB</i>  |
| 12               | 0.09913         | 0.1169          |
| 14               | <b>0.01073</b>  | <b>4.34e-03</b> |
| 16               | <b>5.68e-05</b> | <b>1.76e-06</b> |
| 18               | <b>0.03325</b>  | <b>1.2e-04</b>  |
| 20               | <b>1.05e-03</b> | <b>6.37e-03</b> |
| 22               | <b>0.02322</b>  | <b>1.1e-04</b>  |
| 24               | 0.3119          | 0.1019          |

**S2 Table. Significance test of knock-down effects of siRNA treatments in *Ephestia kuehniella* using an unpaired one-tailed *t*-test for unequal variances.** Expression levels significantly differing from each other between treatments ( $P < 0.05$ ) are indicated in bold.

| Treatment comparison | Sex    | <i>P</i> -value |                |
|----------------------|--------|-----------------|----------------|
|                      |        | <i>EkMasc</i>   | <i>EkMascB</i> |
| siGFP – siMasc_II    | Female | <b>0.0335</b>   | <b>0.0416</b>  |
| siGFP – siMasc_VII   | Female | <b>0.0034</b>   | <b>0.0090</b>  |
| siGFP – siMasc_II    | Male   | <b>0.0311</b>   | <b>0.0137</b>  |
| siGFP – siMasc_VII   | Male   | <b>0.0300</b>   | <b>0.0164</b>  |

**S3 Table. Overview of primers and siRNAs used in this study.**

| Primer name                              | Primer sequence (5' - 3')              | Gene                  | Purpose                                                                    | Reference                                                                                                       |
|------------------------------------------|----------------------------------------|-----------------------|----------------------------------------------------------------------------|-----------------------------------------------------------------------------------------------------------------|
| Masc_F1                                  | TGTCGCGAYTATGTTTGGGGW                  | <i>EkMasc/EkMascB</i> | Identification<br><i>EkMasc/EkMascB</i>                                    | This study                                                                                                      |
|                                          |                                        |                       | 3' RACE-PCR<br>(first round PCR)                                           |                                                                                                                 |
|                                          |                                        |                       | Genetic sexing PCR                                                         |                                                                                                                 |
| Masc_R1                                  | GGTAGCCTCCTTATTGAGCCAT                 | <i>EkMasc/EkMascB</i> | Identification<br><i>EkMasc/EkMascB</i>                                    | This study                                                                                                      |
|                                          |                                        |                       | 5' RACE-PCR<br>(second round PCR)                                          |                                                                                                                 |
|                                          |                                        |                       | Genetic sexing PCR                                                         |                                                                                                                 |
| Adapter Primer (AP)                      | GGCCACGCGTCGACTAGTACTTTTTTTTTTTTTTTTTT | -                     | RACE-PCR cDNA synthesis<br><br>First round RACE-PCR for 5'RACE             | Invitrogen 3' RACE System for Rapid Amplification of cDNA Ends kit (Thermo Fisher Scientific, Waltham, MA, USA) |
| Abridged Universal Adapter Primer (AUAP) | GGCCACGCGTCGACTAGTAC                   | -                     | First round RACE-PCR (3'RACE)<br>Second round RACE-PCR (3'RACE and 5'RACE) | Invitrogen 3' RACE System for Rapid Amplification of cDNA Ends kit (Thermo Fisher Scientific, Waltham, MA, USA) |
| Masc_VII_F1                              | ACGYGCTGAATGATCCCGAT                   | <i>EkMasc/EkMascB</i> | 3' RACE-PCR (second round PCR)                                             | This study                                                                                                      |
| Masc_V_R1                                | CGGAGGTTTGGTAGTGCAAT                   | <i>EkMasc/EkMascB</i> | 5' RACE-PCR (cDNA primer)                                                  | This study                                                                                                      |
| Masc_IV_R1                               | ACAGGCCTTGATGGTGAAT                    | <i>EkMasc/EkMascB</i> | 5' RACE-PCR (first round PCR)                                              | This study                                                                                                      |
| Masc_Sb_F                                | TGTTTCAGGTCCAAGCAATGT                  | <i>EkMasc/EkMascB</i> | Southern blot                                                              | This study                                                                                                      |
| Masc_Sb_R                                | TCAGTCTTACTCGCAGTCTCC                  | <i>EkMasc/EkMascB</i> | Southern blot                                                              | This study                                                                                                      |
| Masc_F_Via                               | ACTGAAACAACCACCTGCGA                   | <i>EkMasc/EkMascB</i> | qPCR Z-linkage                                                             | This study                                                                                                      |
| Masc_R_VI                                | ATTTGTTTCGCGCACCAAATGT                 | <i>EkMasc/EkMascB</i> | qPCR Z-linkage                                                             | This study                                                                                                      |
| Ek_Ace2_F                                | CCCAGCAACACCTAAGAGTCC                  | <i>Ace2</i>           | qPCR Z-linkage                                                             | This study                                                                                                      |
| Ek_Ace2_R                                | TGTACAAGTCGAGTGTGGCC                   | <i>Ace2</i>           | qPCR Z-linkage                                                             | This study                                                                                                      |

|               |                             |                       |                                              |                                   |
|---------------|-----------------------------|-----------------------|----------------------------------------------|-----------------------------------|
| rp49_deg_F1   | ATTGACAACAGAGTSCGCAG        | <i>rp49</i>           | Isolation rp49                               | This study                        |
| rp49_deg_R1   | CTGATGCTGAGCTGCTGGGC        | <i>rp49</i>           | Isolation rp49                               | This study                        |
| qrp49_F2      | GGTTACGGATCAAACAAGAAGAC     | <i>EkRp49</i>         | qRT-PCR                                      | This study                        |
| qrp49_R2      | GATTTCCAGCTCACGTACATTG      | <i>EkRp49</i>         | qRT-PCR                                      | This study                        |
| qMasc_F2      | GCTTGGTCGGTTGAGTTTG         | <i>EkMasc</i>         | qRT-PCR                                      | This study                        |
| qMasc_R2      | GCCCTGTGCATTATAACCTTG       | <i>EkMasc</i>         | qRT-PCR                                      | This study                        |
| qMascB_F1     | GCTGGAACCTTTGATGCAGAAC      | <i>EkMascB</i>        | qRT-PCR                                      | This study                        |
| qMascB_R1     | CCCAACCTCTTAGCGTACTTAAC     | <i>EkMascB</i>        | qRT-PCR                                      | This study                        |
| Masc_bmd_qF1  | TAGACATTGACACTACCAAACC      | <i>EkMasc/EkMascB</i> | Splicing                                     | This study                        |
| Masc_R_X      | ACGTTGGTGGGAATGACGGAA       | <i>EkMasc/EkMascB</i> | Splicing                                     | This study                        |
| qPiMasc_F1    | AGAAAGCAGTGTAACACTTTCACGAA  | <i>PiMasc</i>         | Splicing                                     | This study                        |
| qPiMasc_R2    | GGTCTCATTTGAACTCGAACTTCCA   | <i>PiMasc</i>         | Splicing                                     | This study                        |
| CpMasc_F4     | TCCGTTTTCTCAACTTCGCCC       | <i>CpMasc</i>         | Splicing                                     | This study                        |
| CpMasc_R2     | TTAAAAGACACCGAATTATCCAGTTGT | <i>CpMasc</i>         | Splicing                                     | This study                        |
| dsx_dR_F2     | CTCTAGTCCTCGTCATCCTCAA      | <i>Ekdsx</i>          | Determine RNAi effects on sexual development | This study                        |
| dsx_dR_R2     | CGACATGCTGTACTCCTTCTC       | <i>Ekdsx</i>          | Determine RNAi effects on sexual development | This study                        |
| siRNA name    | siRNA sequence (5'-3')      | Gene                  | Purpose                                      | Reference                         |
| siMasc_II_s   | CCAGGAAGAUAGAAACUGAAA       | <i>EkMasc/EkMascB</i> | RNAi                                         | This study                        |
| siMasc_II_as  | UCAGUUUCUAUCUCCUGGUU        | <i>EkMasc/EkMascB</i> | RNAi                                         | This study                        |
| siMasc_VII_s  | UAGUAUGUCAAGAGAAGAUUC       | <i>EkMasc/EkMascB</i> | RNAi                                         | This study                        |
| siMasc_VII_as | AUCUUCUCUUGACAUACUAAU       | <i>EkMasc/EkMascB</i> | RNAi                                         | This study                        |
| siGFP gui-1   | AUAGACGUUGUGGUCUGUUGUA      |                       | RNAi (negative control)                      | Kiuchi et al. (2014) <sup>a</sup> |
| siGFP pas-1   | CAACAGCCACAACGUCUAAUUU      |                       | RNAi (negative control)                      | Kiuchi et al. (2014) <sup>a</sup> |

<sup>a</sup> Kiuchi T, Koga H, Kawamoto M, Shoji K, Sakai H, Arai Y, et al. A single female-specific piRNA is the primary determiner of sex in the silkworm. *Nature*. 2014; 509(7502):633–636. doi: 10.1038/nature13315

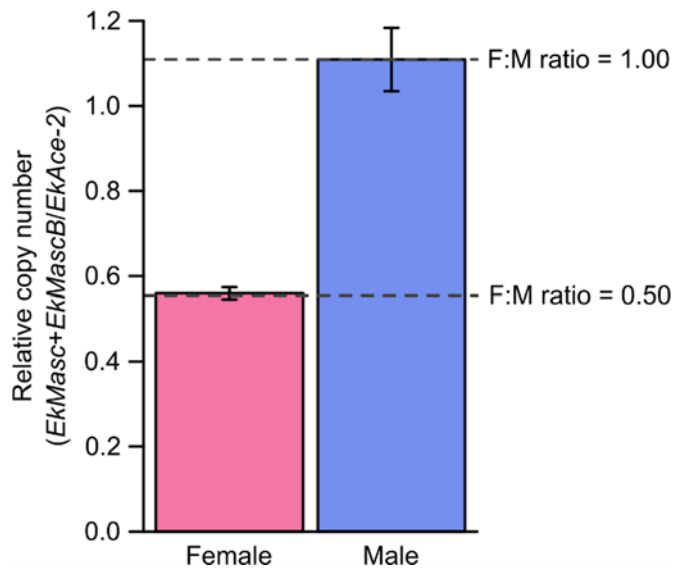

**S1 Fig. *EkMasc* and *EkMascB* Z-linkage assessed by qPCR using genomic DNA of *Epehstia kuehniella*.** Relative copy numbers were assessed for female and male samples (n = 3 for both sexes). Indicated are hypothetical *EkMasc* and *EkMascB* female to male ratios relative to male copy numbers corresponding to the autosomal hypothesis (both *EkMasc* and *EkMascB* located on autosomes; F:M ratio = 1.00), and the Z chromosomal hypothesis (F:M ratio = 0.50). Error bars indicate standard deviation.

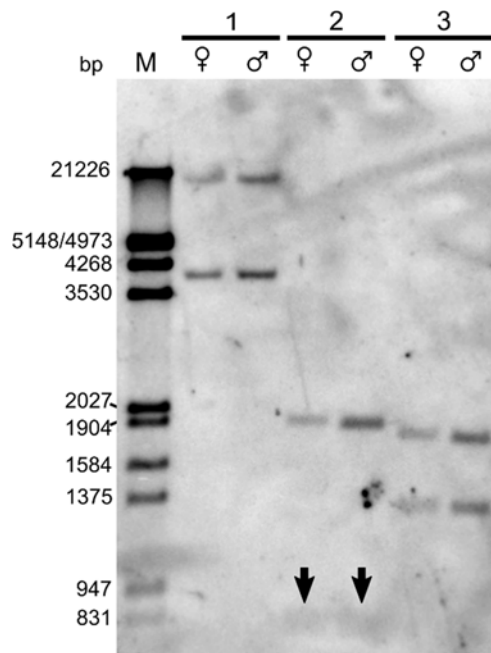

**S2 Fig. Southern blot assay using *EkMasc* probe in *Ephemera kuehniella*.** Two signals can be identified in the genomic DNA of both female and male samples double digested with (1) *NdeI* x *NotI*, (2) *DraI* x *NheI*, and (3) *AgeI* x *BspHI*. Arrows indicate highly diffused bands. Note that female signals are weaker than male signals. Indicated are the marker (M) in bp, female (♀) and male (♂) samples.

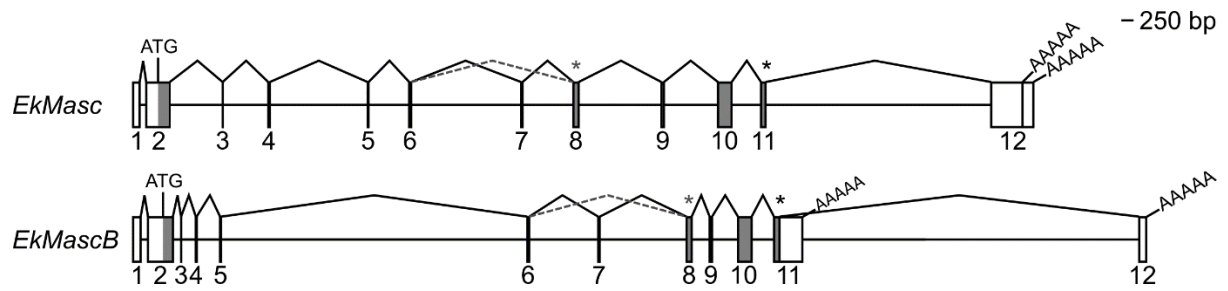

**S3 Fig. Exon-intron map of the *EkMasc* and *EkMascB* genes in *Ephestia kuehniella*.** Two polyadenylation sites are indicated for each gene, as well as the open reading frame (grey) including the start (ATG) and stop codon (\*). Additionally indicated is the splice variant skipping exon VII (dashed grey line) and its corresponding premature stop codon (grey \*).



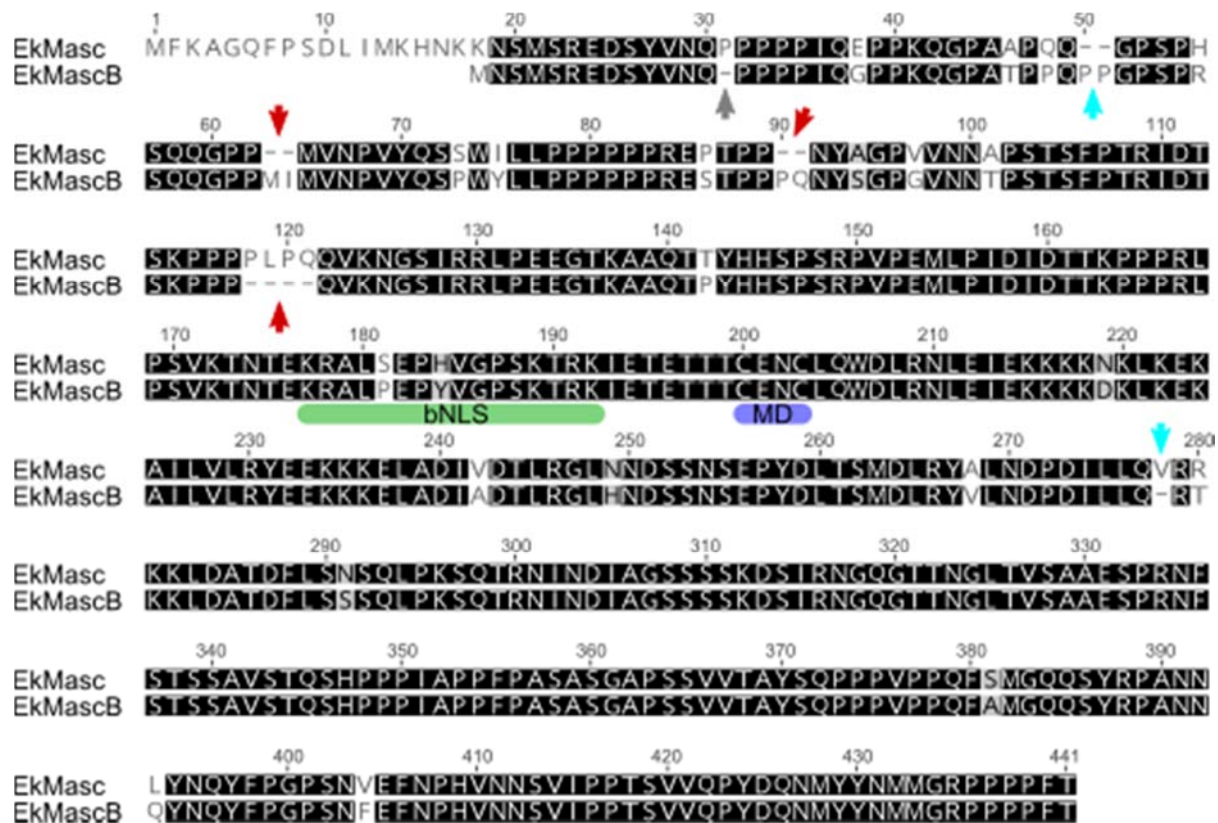

**S4 Fig. Protein alignment of EkMasc and EkMascB of *Ephestia kuehniella*.** Indicated in the alignment are the conserved bipartite nuclear localization signal (bNLS; green) and the masculinizing domain (MD; blue). Also indicated are deletions (red arrows) and insertions (cyan arrows) in either EkMasc or EkMascB based on comparison to the Masc protein sequence of the closely related *Plodia interpunctella*. A single grey arrow (at amino acid 31) indicates an indel between EkMasc and EkMascB that cannot be categorized as a deletion or an insertion in either protein sequence based on the Masc protein sequence of *P. interpunctella*.

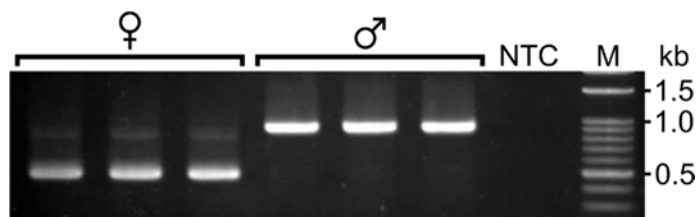

**S5 Fig. Genetic sexing of *Ephestia kuehniella*.** Note the two bands in female samples. Indicated are marker (M) in kb, no template control (NTC), female (♀) and male (♂) samples.

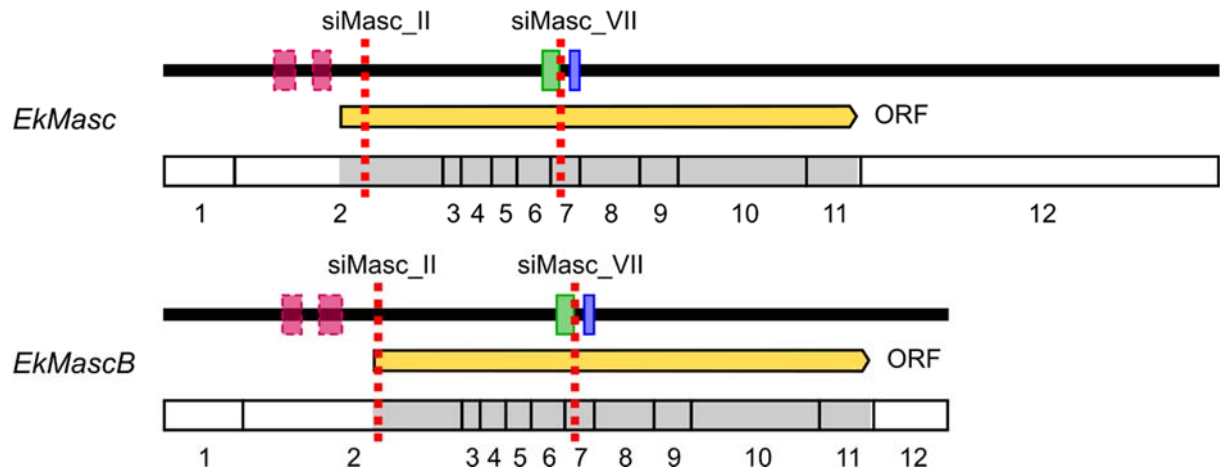

**S6 Fig. Illustrative set-up of the RNAi experiments in *Ephestia kuehniella*.** Indicated in the figure are the degenerated zinc finger motifs (pink boxes) upstream of the open reading frame, the bipartite nuclear localization signal (green box), the male determining region (blue box), the open reading frame (yellow) and the two siRNAs targeting *EkMasc* and *EkMascB* (red dashed lines). Also shown is an exon representation of the genes.

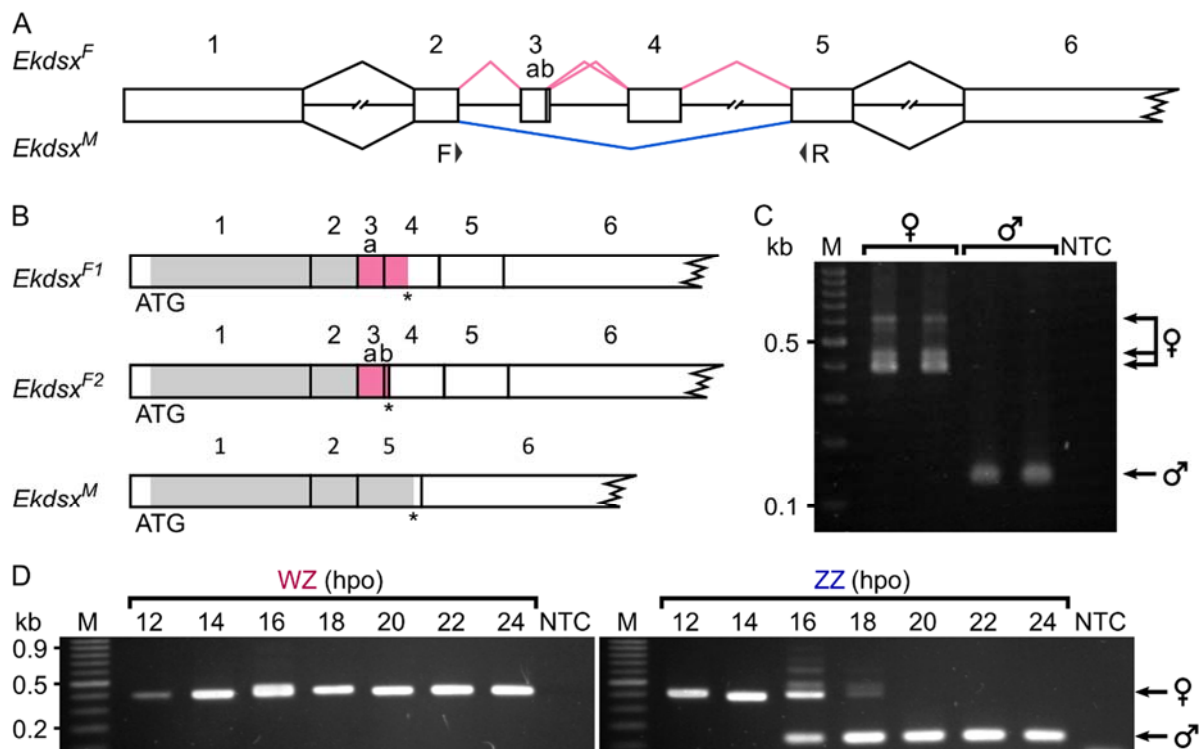

**S7 Fig. Splicing pattern of *Ekdsx* in *Ephestia kuehniella*.** (A) Schematic representation of female- (pink line) and male-specific (blue line) splicing patterns of *Ekdsx*. Indicated below the figure are the targets of the primers used throughout the article (F and R). (B) The two dominant female- and the dominant male-specific transcripts and their predicted respective open reading frames (in grey/pink). (C) Sex-specific splicing of *Ekdsx* as detected by the primers indicated in A. A currently uncharacterized third female-specific splice variant is also visible (the top arrow). (D) Sex-specific splicing pattern of *Ekdsx* during early development in WZ (left) and ZZ (right) individuals. Note transitions of *Ekdsx* splicing from female-specific to male-specific in ZZ individuals only, 16–18 hours post oviposition (hpo). Indicated are marker (M) in kb, and no template control (NTC).

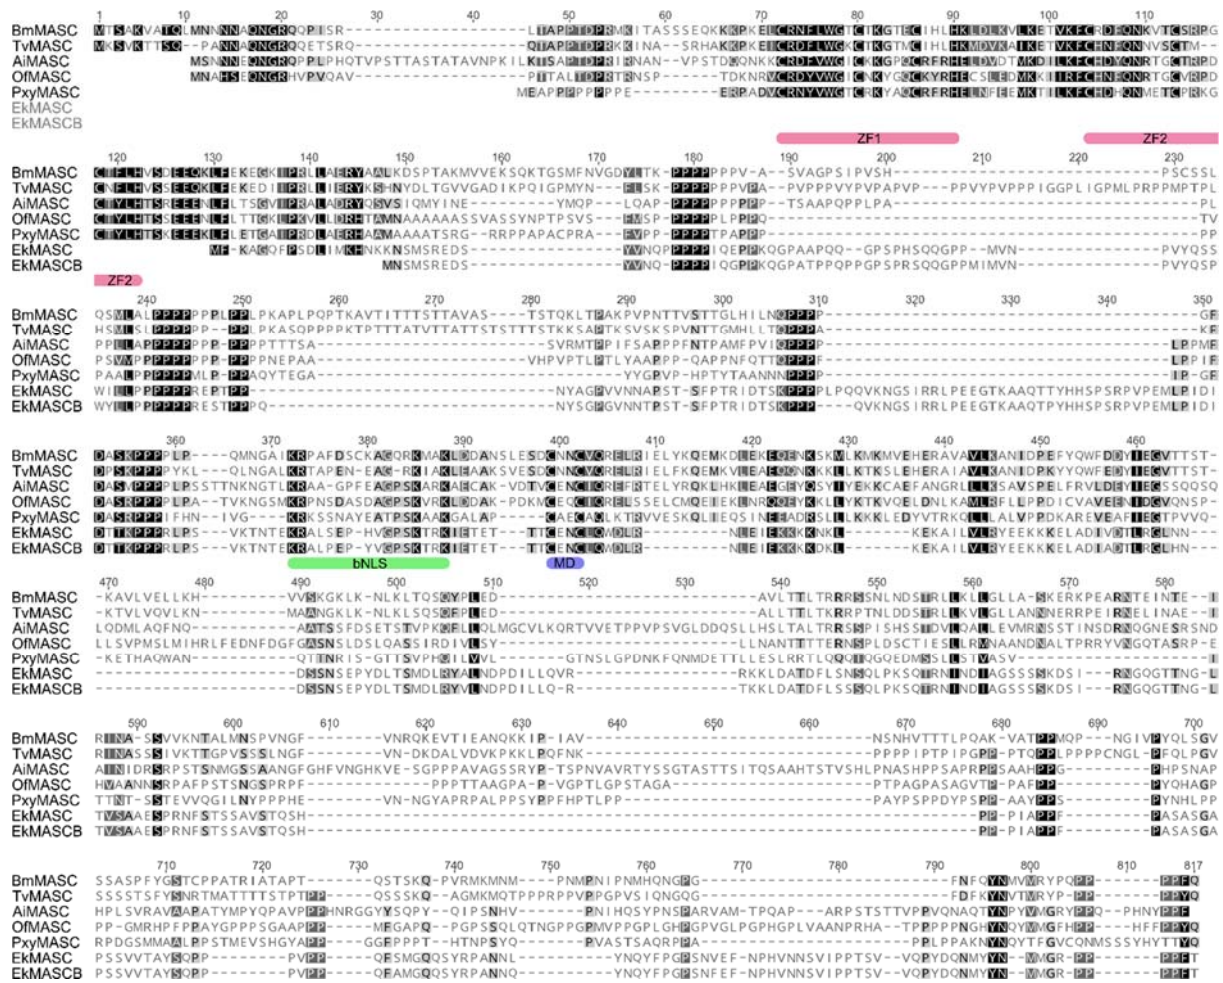

**S8 Fig. Alignment of functionally confirmed Masc proteins in six lepidopteran species.** The alignment shows low levels of amino acid homology even within the functional domains. Indicated below the alignment are the conserved zinc finger domains (ZF1 & ZF2; pink), the bipartite nuclear localization signal (bNLS; green) and the masculinizing domain (MD; blue). Aligned are the Masc protein sequences of *Bombyx mori* (Bm), *Trilocho varians* (Tv), *Agrotis ipsilon* (Ai), *Ostrinia furnacalis* (Of), *Plutella xylostella* (Pxy), and *Ephestia kuehniella* (Ek).

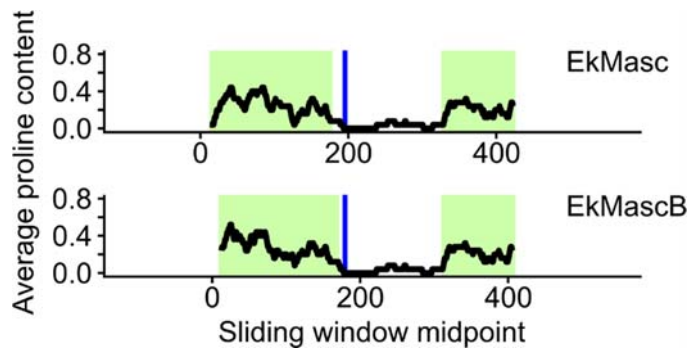

**S9 Fig. Sliding window analysis of proline content for EkMasc and EkMascB proteins in *Ephestia kuehniella*.** Note that the proline distribution in both proteins is very similar.





## S1 Methods

### Identification and isolation of *EkMasc* and *EkMascB* sequences

**Cloning, plasmid isolation and sequencing.** The PCR products were pooled (eggs and pupa samples separate) and purified using the Wizard® SV Gel and PCR Clean-Up System (Promega, Madison, WI, USA) and subsequently cloned by ligating overnight into the pGEM-T Easy vector (Promega) and transforming into *Escherichia coli* strain DH5 $\alpha$  according to the manufacturer's protocol with minor adjustments. Cells were heat-shocked for 90 s at 42°C, and only 800  $\mu$ L of LB medium was added during the recovery phase. Positive colonies were screened by PCR using universal M13 primers, and amplicons were checked on a 1% agarose gel. Colonies with inserts of the predicted size were inoculated into 3 mL of LB medium containing 50  $\mu$ L/mL ampicillin and incubated overnight at 37°C, 200 rpm. Plasmids were subsequently isolated using the NucleoSpin Plasmid kit (Macherey-Nagel, Düren, Germany) according to the manufacturer's protocol and inserts were sequenced (SEQme, Dobříš, Czech Republic).

**RACE-PCR.** The first round of 3'-RACE-PCR was performed with a gene-specific forward primer (Masc\_F1) and the abridged universal amplification primer (AUAP). This 10  $\mu$ L final PCR reaction mixture was composed of 2  $\mu$ M gene-specific forward primer, 0.2  $\mu$ M AUAP, 0.8 mM dNTPs, 1 $\times$  Ex *Taq* DNA polymerase buffer, 0.25 units of Ex *Taq* DNA polymerase and 1  $\mu$ L of template cDNA. The primer concentration of the forward primer was increased with respect to the reverse primer to avoid off-target amplification of only the reverse primer. An additional round of semi-nested PCR was performed to increase gene-specific amplification. The PCR reaction volume was increased to 20  $\mu$ L and the forward primer was substituted with a nested gene-specific primer (Masc\_VII\_F1) at a final concentration of 0.2  $\mu$ M (equal to the reverse primer). In addition, the amount of Ex *Taq* DNA polymerase was increased to 0.5 units per reaction. Template for the semi-nested PCR was 100 $\times$  diluted non-purified PCR product of the preceding 3' RACE-PCR. Both PCR reactions were performed at 94°C for 3 min; 35 cycles of 94°C for 40 s, 55°C for 40 s and 72°C for 2 min 30 s; and a final extension at 72°C for 3 min. Final PCR products were visualized on a 1% agarose TAE gel using ethidium bromide (EtBr) as a stain. PCR products were purified directly or strong bands were cut from the gel and purified using Wizard® SV Gel and PCR Clean-Up System (Promega) as described by the manufacturer, cloned and sequenced as described above.

For 5'-RACE-PCR, we followed the procedure described in Frohman et al. (1988). The synthesized cDNA was purified using an Illustra Sephadex G-50 column (GE Healthcare Life Sciences, Buckinghamshire, UK) and then poly-A tail was added using Terminal Transferase (New England Biolabs, Ipswich, MA, USA) according to the manufacturer's protocol with 200  $\mu$ M dATPs and an incubation time of 45 min. Amplification of gene specific 5' RACE transcripts was done in two steps. The first step was performed in a 10  $\mu$ L PCR volume and was composed of 0.2  $\mu$ M adapter primer (AP), 0.2  $\mu$ M gene-specific primer Masc\_IV\_R1, 0.8 mM dNTPs, 1 $\times$  Ex *Taq* DNA polymerase buffer, 0.25 units of Ex *Taq* DNA polymerase and approximately 10-30 ng of poly-A-tailed cDNA. For the second step, PCR volumes were increased to 20  $\mu$ L, primers were substituted with AUAP and the nested gene-specific primer Masc\_R1, and 1  $\mu$ L of the 10 $\times$  diluted PCR-product from the previous step was used as template DNA. Both thermocycling reactions were performed as described above for 3' RACE PCR. Final PCR products were processed as described for 3' RACE-PCR.



## Assessment of copy number and localization of *Masc* using Southern hybridization

**DNA digestion for Southern hybridization.** DNA was double digested using *NdeI* × *NotI*, *DraI* × *NheI* (all Fermentas, Vilnius, Lithuania), or *AgeI* × *BspHI* (New England Biolabs) following the manufacturer's instructions, using Orange buffer, Tango buffer, or CutSmart buffer, respectively. Digestions were incubated at 37°C overnight and an additional volume of these enzymes was added the next morning, after which the samples were incubated for another 1 h to ensure complete digestion of the DNA. Digestion reactions were stopped by adding Gel Loading Dye Purple (New England Biolabs) to a final 1× concentration. Then the digested DNA was separated on a 1% TBE agarose gel, run at 70 V per centimeter of gel distance for 4 h.

**Southern hybridization probe.** Primers for the Southern hybridization probe were designed in the region of high sequence identity between *EkMasc* and *EkMascB* targeting exon XI using Geneious 9.1.6. Initial PCR was performed using *Masc\_Sb\_F* and *Masc\_Sb\_R* primers and male genomic DNA as a template using the standard PCR mix described above (see "Identification and isolation of *EkMasc* and *EkMascB* sequences"). The obtained PCR products were checked on a 1% agarose gel for successful amplification, purified, cloned, and sequenced as described above. Plasmid DNA was isolated from a clone containing the expected *EkMasc* sequence and this plasmid DNA was used in PCR to generate a template for PCR-labeling. This 50 µL PCR reaction consisted of 0.2 µM of both *Masc\_Sb\_F* and *Masc\_Sb\_R*, 0.2 mM dNTPs, 1× Ex *Taq* Buffer, 0.25 units of Ex *Taq* DNA polymerase, and 5 ng of plasmid DNA. The reaction was performed using the thermocycling program described for the initial isolation of *EkMasc* and *EkMascB*. Products were purified using the Wizard® SV Gel and PCR Clean-Up System according to the manufacturer's instructions and used as a template in the labeling reaction. The PCR-labeling reaction consisted of 400 nM each of *Masc\_Sb\_F* and *Masc\_Sb\_R*, 40 µM each of dATP, dCTP and dGTP, 14.4 µM dTTP, 25.6 µM of digoxigenin-11-dUTPs (Roche Diagnostics, Mannheim, Germany), 1× Ex *Taq* Buffer, 0.625 units of Ex *Taq* polymerase, and approximately 5 ng of template in a total reaction volume of 25 µL. Amplification of the probe was done according to the following profile: denaturation at 94°C for 90 s (1 cycle), denaturation at 94°C for 30 s, annealing at 55°C for 30 s, elongation at 72°C for 60 s (35 cycles), and final elongation at 72°C for 60 s (1 cycle). The probes were then purified using an Illustra Sephadex G-50 column, and their concentrations were measured on a Qubit 3.0 Fluorometer using the dsDNA BR Assay Kit (Invitrogen, Carlsbad, CA).

## Z-linkage of *EkMasc* and *EkMascB* by quantitative real-time PCR (qPCR)

**qPCR.** Concentrations of DNA extracted from *Ephestia kuehniella* larvae were measured on an Invitrogen Qubit 3.0 Fluorometer using the dsDNA BR Assay Kit. Primers were designed to target both *EkMasc* and *EkMascB* simultaneously in a conserved region of the genes using Geneious 9.1.6. The protein sequence of *Bombyx mori* acetylcholinesterase type 2 (accession number ABY50089.1) was used in a tBLASTn search against the *E. kuehniella* genome to identify a partial *EkAce-2* sequence (accession number MW505944), which was then used to design primers using Geneious 9.1.6. qPCR was carried out on a C1000 Thermal cycler CFX96 Real-Time System (Bio-Rad, Hercules, CA) with a cycle program of 95°C for 3 min initial denaturation followed by 45 cycles of 94°C for 30 s denaturation, 60°C for 20 s combined annealing and extension, 95°C for 15 s final denaturation, and 65°C to 95°C by 0.5°C steps of 5 s to analyze the melting curve. Experiments were run in FrameStar 96 well plates sealed with qPCR adhesive foil (both Institute of Applied Biotechnologies, Prague, Czech Republic). Primer efficiencies were determined by dilution series analysis and calculated using the Bio-Rad CFX Manager 3.0 software (Bio-Rad Laboratories, Hercules, CA).

## Tissue-specific splicing of *Masc*

**Primer design.** Primers were designed using Geneious 9.1.6 with “Product Size” setting to 450–500 for *Cydia pomonella* and 1000–1200 for *Plodia interpunctella*. To ensure the design of primers that would amplify both *Masc* and *Masc<sup>ms</sup>* splice variants, the “Target Region” setting was set to include the exon containing the masculinizing region in both species. To this end, the *CpMasc* sequence was manually assembled from the non-assembled transcriptome reads, as the tBLASTn search against the assembled transcriptome did not yield any significant hits. An initial fragment of *CpMasc* was obtained by a tBLASTn search against the non-assembled *C. pomonella* 1-day-old eggs transcriptome reads (accession number SRX5284305), after which the initial sequence was extended using multiple rounds of BLASTn searches until an open reading frame was detected (accession number MW505945).

**Dissection.** We dissected out the testes of the pre-final instar larvae (prior to fusion of the testes) of *E. kuehniella*, *P. interpunctella*, and *C. pomonella* in physiological solution (Glaser 1917; cited in Lockwood, 1961). For each individual, we immediately isolated RNA from the testes and separately from the remaining body tissue using TRI Reagent as described in Materials and methods (see main text). For testis samples, 20 µg of RNA grade glycogen (Thermo Fisher Scientific, Waltham, MA) was added before precipitation to reduce loss of RNA. In *E. kuehniella*, the same procedure was repeated for pupa samples.

Lockwood AP. ‘Ringer’ solutions and some notes on the physiological basis of their ionic composition. *Comp Biochem Physiol.* 1961; 2:241–289. doi: 10.1016/0010-406x(61)90113-x

## Expression analysis of *EkMasc* and *EkMascB* during embryogenesis

**Sample treatment.** For each time point, sixteen embryos were crushed individually in TRI Reagent and stored at –80°C until RNA was isolated to ensure a minimum of three samples for each sex would be available to measure expression levels. Prior to precipitation, 20 µg glycogen RNA grade (Thermo Fisher Scientific) was added as co-precipitate to reduce RNA loss. RNA pellets were stored at –80°C in ethanol until further use.

### Back extraction DNA isolation protocol.

<https://www.thermofisher.com/cz/en/home/references/protocols/nucleic-acid-purification-and-analysis/dna-extraction-protocols/tri-reagent-dna-protein-isolation-protocol.html>

In short, an equal volume of back extraction buffer (4 M guanidine thiocyanate, 50 mM sodium citrate, 1 M Tris base) was added to the organic phase, samples were mixed for 15 s, centrifuged, and the aqueous phase was transferred to a new tube. 20 µg of glycogen was added to the samples and DNA was precipitated by adding 2/3 volume of isopropanol and incubating for 5 min at room temperature. After centrifugation, the pellets were washed twice with 70% ethanol and dissolved in 20 µL nuclease-free water.

**Identification of *Ekrp49* and primer design.** A set of degenerated primers (rp49\_deg\_F1 and rp49\_deg\_R1) was designed for *rp49* in a conserved region of the gene in Lepidoptera based on sequences from *B. mori* (NM\_001098282.1), *Glyphodes pyloales* (MH715949.1), *Helicoverpa armigera* (JQ744274.1), and *Heliconius melpomene* (EF207973.1). The PCR mixture and cycling program were the same as described for the initial isolation of *EkMasc* and *EkMascB*, but with an annealing temperature of 52°C and scaled up to a final volume of 40 µL. The products obtained were purified, cloned and sequenced as described above. Primers for *Ekrp49* (qrp49\_F2 and qrp49\_R2) were

designed on the *E. kuehniella* sequence obtained (accession number MW505943) using Geneious 9.1.6, while primers for *EkMasc* (qMasc\_F2 and qMasc\_R2) and *EkMascB* (qMascB\_F1 and qMascB\_R1) were designed manually in highly diverged regions of the genes. Manually designed primers were subsequently checked for primer-dimers, hairpins, and off-target amplification using Geneious 9.1.6. All primers were tested with single embryo samples and pooled embryo samples for potential off-target amplification and primer-dimers prior to the experiment. To detect off-target amplification and primer-dimers, melting curves were analyzed for secondary peaks and products were run on a 1.5% agarose gel. In addition, amplification efficiencies of each primer pair were determined by a three-fold dilution series of the pooled embryos cDNA sample using the Bio-Rad CFX Manager 3.0 software (Bio-Rad Laboratories).

### **Functional analysis of *EkMasc* and *EkMascB***

**siRNA design.** *EkMasc* and *EkMascB* coding sequences were aligned and screened for two consecutive adenine nucleotides, conserved in both sequences, in exons II and VII. For both exons, additional consecutive 19 nucleotides of perfect homology between the two sequences were selected as potential siRNA target sequences and were compared against the *E. kuehniella* genome using BLASTn to identify potential off-target binding sites. For both siRNA duplexes, the lowest homology to any other sequence in the genome (<15 nt perfect homology), GC-content, and sequence asymmetry in the siRNA duplexes were assessed.

**Egg collection and microinjection.** Freshly emerged adult females and males were collected and left to mate overnight. Mating couples were isolated the next morning. Because *E. kuehniella* females lay eggs at dusk, the females were transferred to a Petri dish approximately 5 min before the lights off and eggs were collected by 45 min later. Glass microscope slides were prepared by placing a wet piece of filter paper near each end of the slide, and eggs were aligned against the paper using a slightly wetted paint brush. Injections were done using a FemtoJet Microinjector (Eppendorf, Hamburg, Germany). Needles were prepared from 1 mm outer diameter, 0.58 mm inner diameter borosilicate glass capillaries with filament (Sutter Instrument, Novato, CA, USA) using a Magnetic Glass Microelectrode Horizontal Needle Puller PN-31 (Narishige, Tokyo, Japan), as described in Kotwica-Rolinska et al. (2019). After injection, filter papers were removed, and the glass slides were transferred to a Petri dish containing wetted tissue paper to keep high humidity levels. Petri dishes were incubated at 21–22°C.

Kotwica-Rolinska J, Chodakova L, Chvalova D, Kristofova L, Fenclova I, Provaznik J, et al. CRISPR/Cas9 genome editing Introduction and optimization in the non-model insect *Pyrrhocoris apterus*. *Front Physiol.* 2019; 10:891. doi: 10.3389/fphys.2019.00891

**Identification of *Ekdsx*.** To identify a *dsx* ortholog in *E. kuehniella*, we used the male DSX protein from *B. mori* (BmDSXM; accession number AHF81625.1) to perform a tBLASTn search against the *E. kuehniella* genome. However, the male-specific protein segment did not provide any significant hits. Therefore, we used BmDSXM to perform a BLASTp search against all lepidopteran species and obtained the predicted DSXM protein of the closely related *Amyelois transitella* (accession number XP\_013184257.1). This AtDSXM sequence was subsequently used to identify the male-specific segment of *Ekdsx*.
